# Supplementary material for: Deep Sequencing of MYC DNA-Binding Sites in Burkitt Lymphoma
Source: PubMed Central journal article supplement (PMC3213110; doi:10.1371/journal.pone.0026837), 2011-11-10

170810000

5 kb

170815000

170820000

170825000

Real-time DNA-PCR

NPM1

MYC Peaks

RefSeq Genes

BL41 Input

BL41 ChIP

Blue1 Input

Blue1 ChIP

CA46 Input

CA46 ChIP

Ramos Input

Ramos ChIP

Raji Input

Raji ChIP

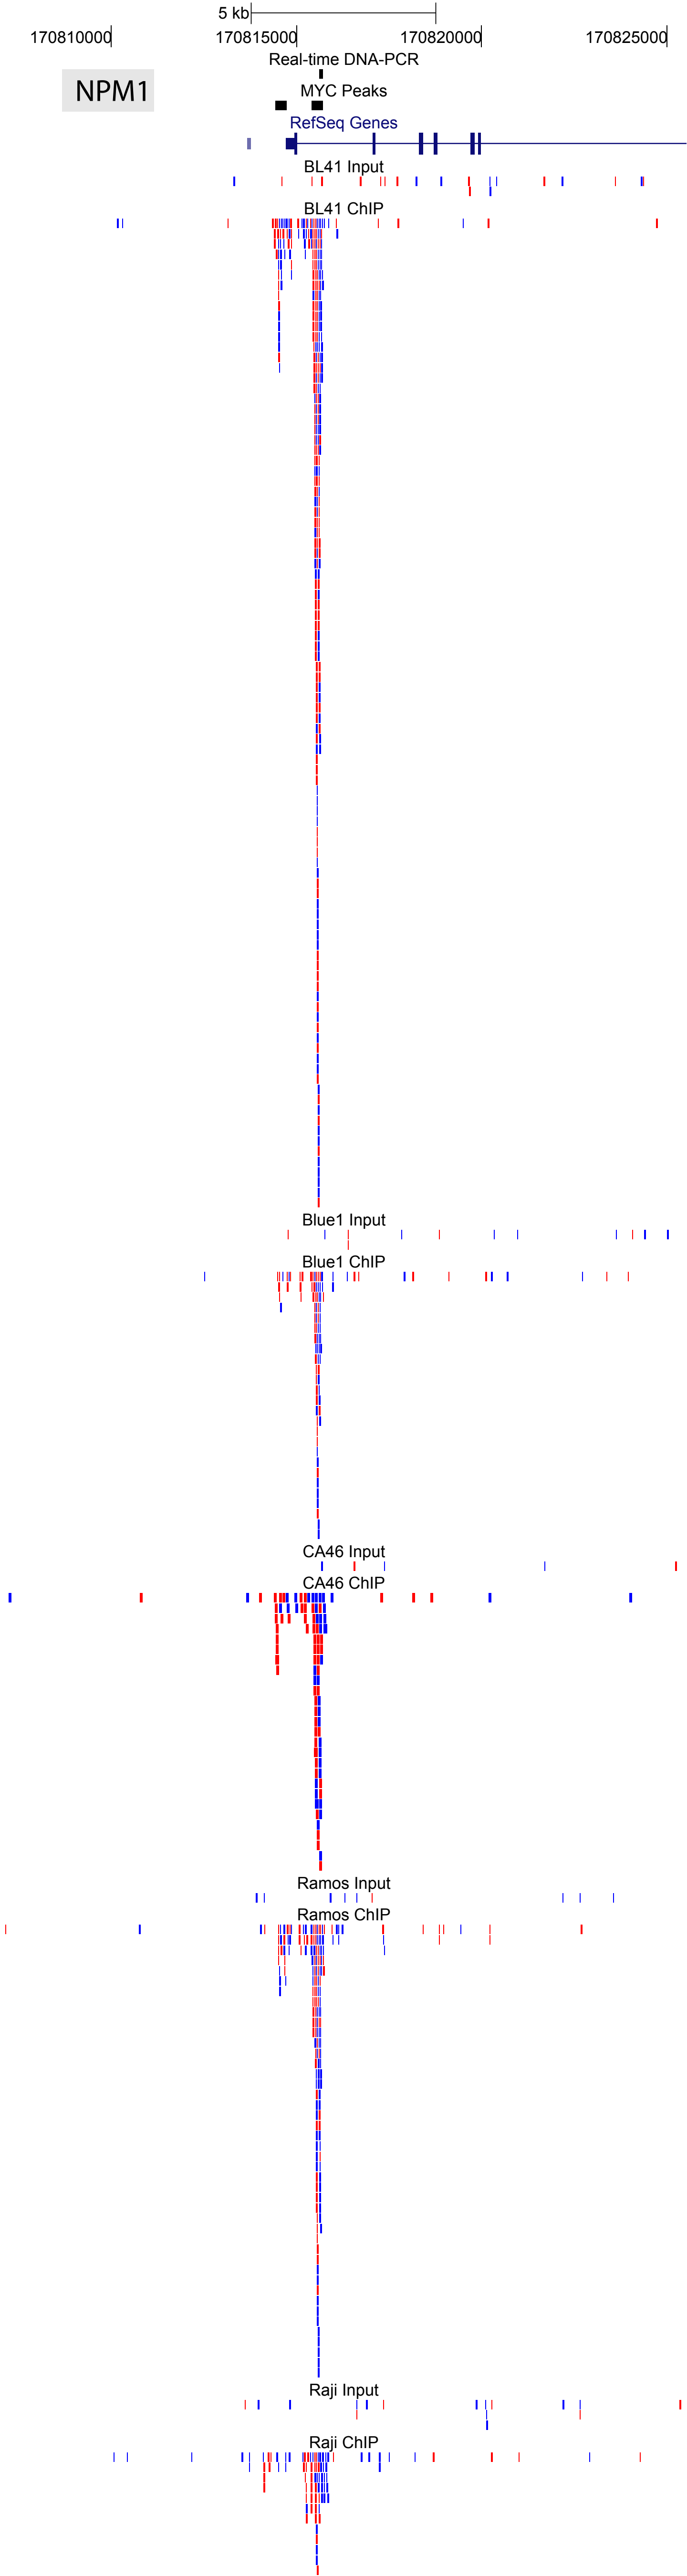

Supplement: pone.0026837.s002.pdf [file pone.0026837.s002.pdf]
