# Supplementary material for: Deep Sequencing of MYC DNA-Binding Sites in Burkitt Lymphoma
Source: PubMed Central journal article supplement (PMC3213110; doi:10.1371/journal.pone.0026837), 2011-11-10

Scale  
chr17:

38722000

1 kb

38723000

38724000

38725000

CCR7

RefSeq Genes

Real-time DNA-PCR

RefSeq Genes

MYC Peaks

BL41 Input

BL41 ChIP

Blue1 Input

Blue1 ChIP

CA46 Input

CA46 ChIP

Ramos Input

Ramos ChIP

Raji Input

Raji ChIP

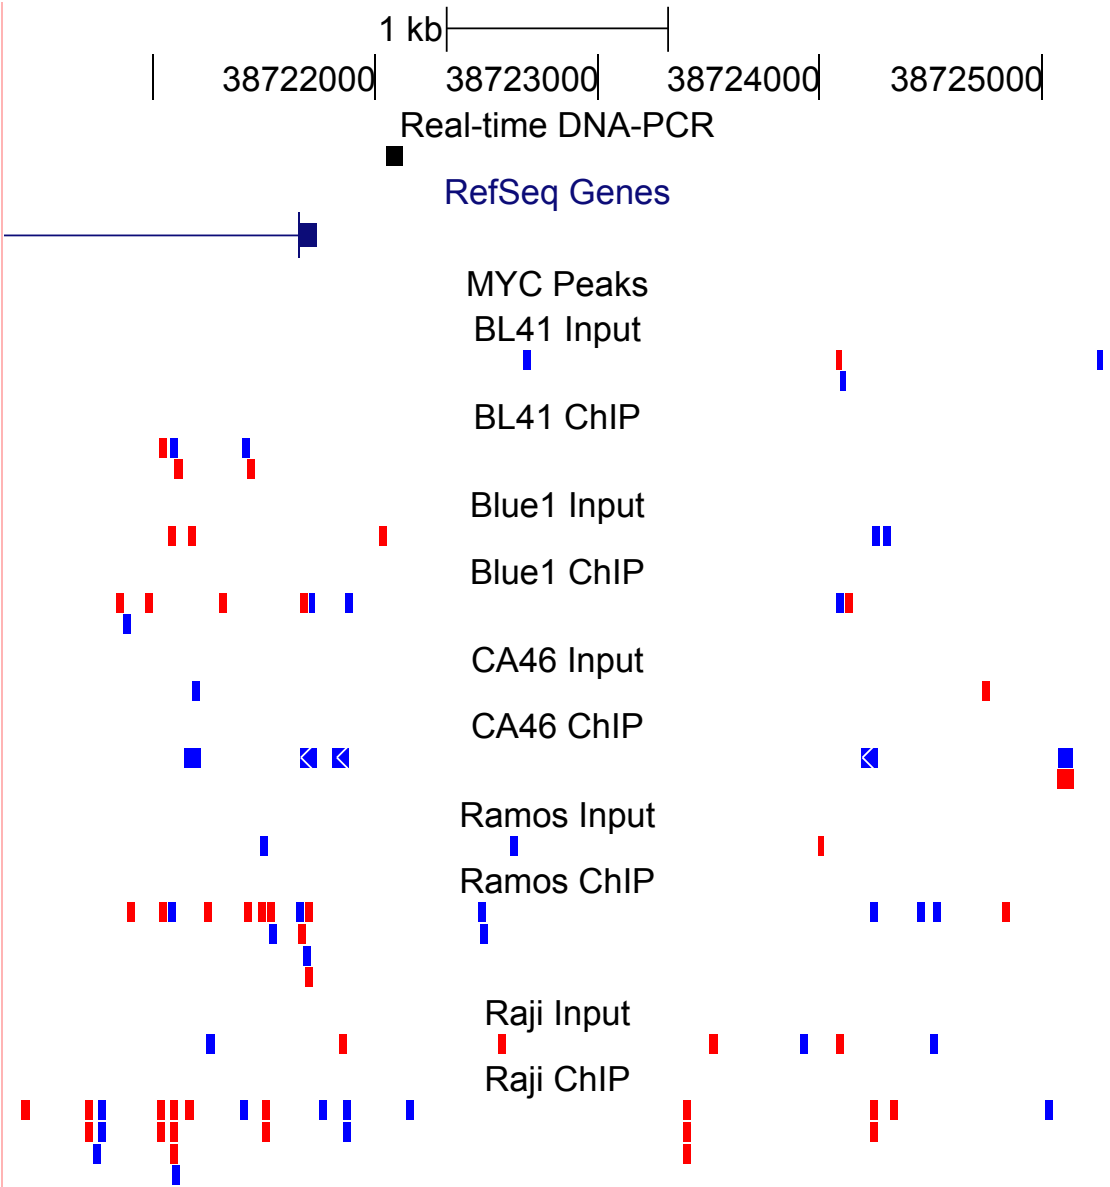

Supplement: pone.0026837.s007.pdf [file pone.0026837.s007.pdf]
