# Supplementary material for: Deep Sequencing of MYC DNA-Binding Sites in Burkitt Lymphoma
Source: PubMed Central journal article supplement (PMC3213110; doi:10.1371/journal.pone.0026837), 2011-11-10

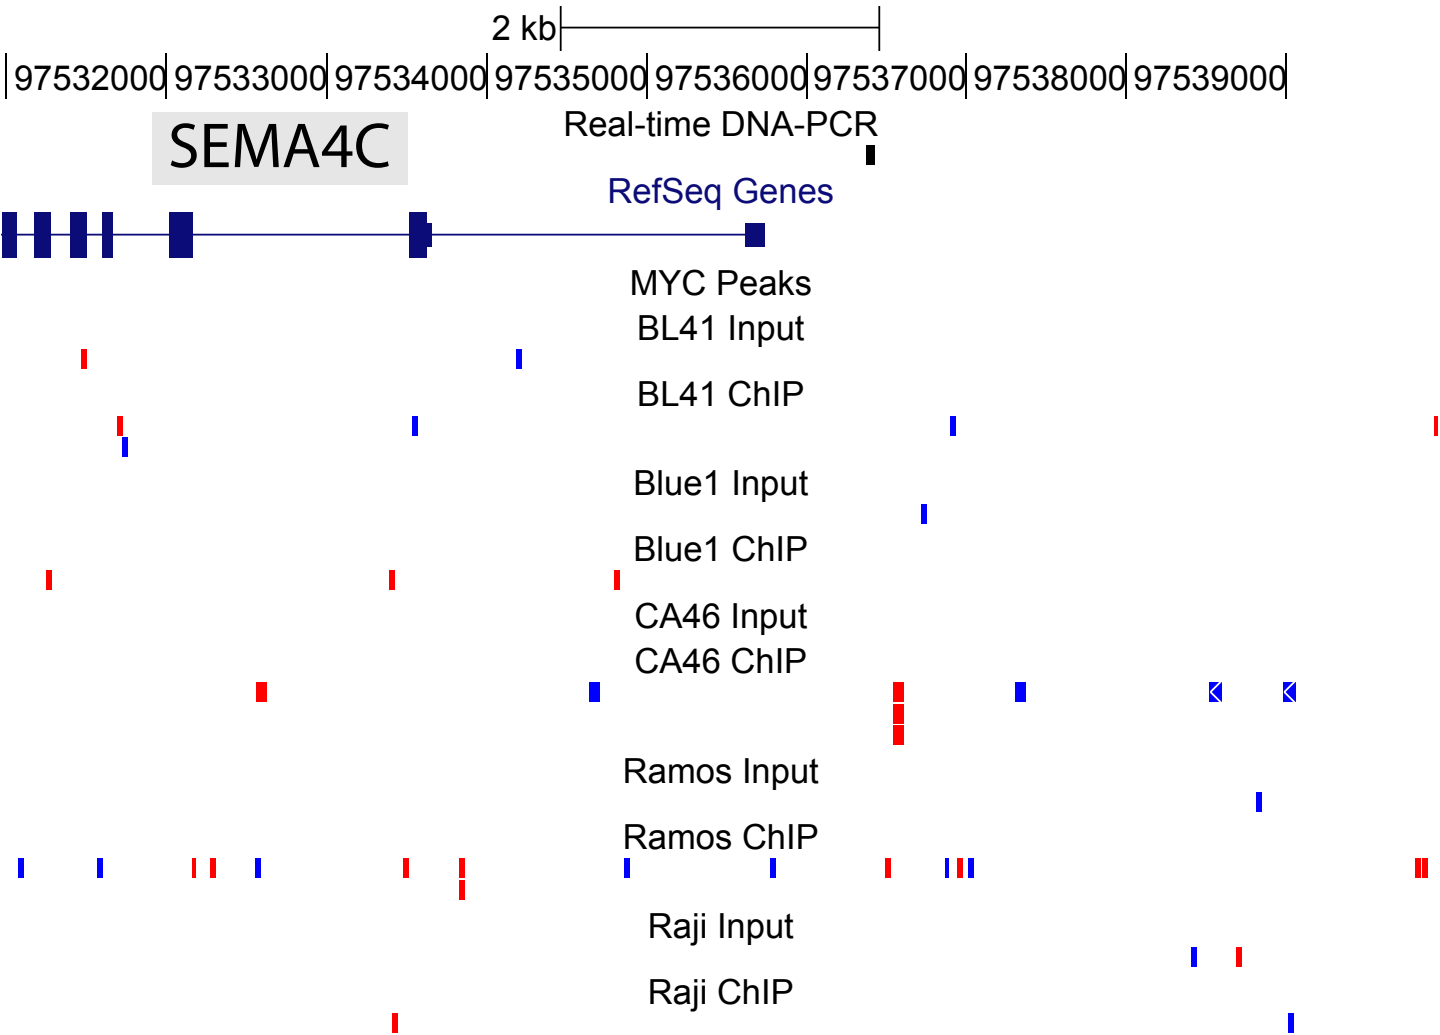

Supplement: pone.0026837.s008.pdf [file pone.0026837.s008.pdf]
