# Supplementary material for: Deep Sequencing of MYC DNA-Binding Sites in Burkitt Lymphoma
Source: PLoS One. 2011 Nov 10;6(11):e26837. doi: 10.1371/journal.pone.0026837 (PMC3213110; doi:10.1371/journal.pone.0026837)
Supplement: Table S2 — Complete list of Ensembl annotations (hg19, GRCh37, Ensembl Genes 59) annotated with the number of detected MYC-binding sites for each Ensembl annotation. (XLS) [file pone.0026837.s011.xls]

## Sheet: AllGRCh37Genes_MycTargets
Table S2: Complete list of Ensembl annotations (hg19, GRCh37, Ensembl Genes 59) annotated with the number of detected MYC-binding sites for each Ensembl annotation.
Column	Column name	Description
A	Ensembl Id	Ensembl gene identification number (Id).
B	External gene Id	Ensembl Biomart "Associated Gene Name" (Hereafter also called gene).
C	Chr	Chromosome.
D	Gene start (bp)	Transcription start site
E	MYC-binding sites	Number of MYC-binding sites.
Ensembl ID	External gene Id	Chr	Gene start (bp)	MYC-binding sites
ENSG00000160967	CUX1	7	101459240	7
ENSG00000148719	DNAJB12	10	74092588	7
ENSG00000169926	KLF13	15	31619058	6
ENSG00000197943	PLCG2	16	81812907	6
ENSG00000251607	AC092275.1	16	85319914	6
ENSG00000152518	ZFP36L2	2	43449541	5
ENSG00000187514	PTMA	2	232571605	5
ENSG00000002822	MAD1L1	7	1855383	5
ENSG00000156030	C14orf43	14	74181825	5
ENSG00000103653	CSK	15	75074425	5
ENSG00000205047	AC010536.1	16	87731749	5
ENSG00000104731	KLHDC4	16	87741418	5
ENSG00000142178	SIK1	21	44834395	5
ENSG00000159023	EPB41	1	29213628	4
ENSG00000248141	AC096947.1	1	61590158	4
ENSG00000160685	ZBTB7B	1	154975133	4
ENSG00000239202	AC104634.1	2	232510709	4
ENSG00000170522	ELOVL6	4	110967002	4
ENSG00000145919	BOD1	5	173034517	4
ENSG00000077809	GTF2I	7	74071994	4
ENSG00000014164	ZC3H3	8	144519825	4
ENSG00000196092	PAX5	9	36833272	4
ENSG00000201861	5S_rRNA	10	327955	4
ENSG00000108179	PPIF	10	81107225	4
ENSG00000168010	ATG16L2	11	72525451	4
ENSG00000135144	DTX1	12	113495662	4
ENSG00000015133	CCDC88C	14	91737669	4
ENSG00000103489	XYLT1	16	17201254	4
ENSG00000247033	AC099508.1	16	75142499	4
ENSG00000167513	CDT1	16	88870186	4
ENSG00000070444	MNT	17	2287354	4
ENSG00000249750	AC007431.1	17	55678228	4
ENSG00000185262	FAM100B	17	74261283	4
ENSG00000131196	NFATC1	18	77155772	4
ENSG00000116017	ARID3A	19	926037	4
ENSG00000127526	SLC35E1	19	16660650	4
ENSG00000101265	RASSF2	20	4760669	4
ENSG00000211685	IGLC7	22	23264766	4
ENSG00000128271	ADORA2A	22	24813847	4
ENSG00000183337	BCOR	X	39909068	4
ENSG00000090020	SLC9A1	1	27425306	3
ENSG00000117394	SLC2A1	1	43391519	3
ENSG00000143590	EFNA3	1	155036300	3
ENSG00000116604	MEF2D	1	156433519	3
ENSG00000228548	RP11-115P16.4	1	226856598	3
ENSG00000231435	AC011747.3	2	8683722	3
ENSG00000180398	MCFD2	2	47129013	3
ENSG00000213399	AC022210.2	2	85142910	3
ENSG00000135925	WNT10A	2	219745085	3
ENSG00000142330	CAPN10	2	241526133	3
ENSG00000144711	IQSEC1	3	12938719	3
ENSG00000131389	SLC6A6	3	14444076	3
ENSG00000203632	AC007690.1	3	186650391	3
ENSG00000240723	AC093602.2	4	140021531	3
ENSG00000164362	TERT	5	1253262	3
ENSG00000171421	MRPL36	5	1798500	3
ENSG00000043143	PHF15	5	133860003	3
ENSG00000164587	RPS14	5	149822753	3
ENSG00000145911	RP11-889L3.3	5	177540556	3
ENSG00000245916	CTC-205M6.1	5	180237401	3
ENSG00000196230	TUBB	6	30687978	3
ENSG00000197283	SYNGAP1	6	33387847	3
ENSG00000137309	HMGA1	6	34204577	3
ENSG00000112759	SLC29A1	6	44187242	3
ENSG00000211983	AL138919.2	6	88557263	3
ENSG00000224478	RP11-13P5.1	6	159528823	3
ENSG00000136231	IGF2BP3	7	23349828	3
ENSG00000160999	SH2B2	7	101928452	3
ENSG00000226380	AC058791.1	7	130565751	3
ENSG00000128585	MKLN1	7	130794855	3
ENSG00000146963	LUC7L2	7	139025105	3
ENSG00000055130	CUL1	7	148395006	3
ENSG00000133740	E2F5	8	86089619	3
ENSG00000104472	CHRAC1	8	141521401	3
ENSG00000185730	ZNF696	8	144373559	3
ENSG00000165025	SYK	9	93564069	3
ENSG00000185963	BICD2	9	95473645	3
ENSG00000198113	C9orf167	9	140172201	3
ENSG00000165802	NELF	9	140342022	3
ENSG00000228637	BX322613.2	10	42388477	3
ENSG00000229485	AL031601.3	10	42644758	3
ENSG00000169813	HNRNPF	10	43881065	3
ENSG00000168209	DDIT4	10	74033678	3
ENSG00000232470	RP11-313D6.3	10	112629501	3
ENSG00000229455	RP13-238F13.4	10	126178392	3
ENSG00000174915	PTDSS2	11	450280	3
ENSG00000184281	TSSC4	11	2421718	3
ENSG00000188211	AC124798.1	11	17373309	3
ENSG00000151702	FLI1	11	128563813	3
ENSG00000134294	SLC38A2	12	46751972	3
ENSG00000111737	RAB35	12	120532899	3
ENSG00000238121	RP11-374F3.4	13	30914407	3
ENSG00000005810	MYCBP2	13	77618792	3
ENSG00000100614	PPM1A	14	60712470	3
ENSG00000078304	PPP2R5C	14	102228222	3
ENSG00000166126	AMN	14	103389004	3
ENSG00000203486	AL583722.1	14	105131255	3
ENSG00000140157	NIPA2	15	23004684	3
ENSG00000188277	C15orf62	15	41062178	3
ENSG00000166949	SMAD3	15	67358183	3
ENSG00000140350	ANP32A	15	69070874	3
ENSG00000073417	PDE8A	15	85523671	3
ENSG00000103495	MAZ	16	29817855	3
ENSG00000181938	GINS3	16	58426298	3
ENSG00000102974	CTCF	16	67596310	3
ENSG00000072736	NFATC3	16	68119375	3
ENSG00000103187	COTL1	16	84599200	3
ENSG00000176715	ACSF3	16	89160217	3
ENSG00000132510	KDM6B	17	7743222	3
ENSG00000108557	RAI1	17	17584787	3
ENSG00000034152	MAP2K3	17	21187984	3
ENSG00000002834	LASP1	17	37026256	3
ENSG00000108312	UBTF	17	42282402	3
ENSG00000169710	FASN	17	80036215	3
ENSG00000182459	TEX19	17	80317123	3
ENSG00000099622	CIRBP	19	1269267	3
ENSG00000129911	KLF16	19	1852398	3
ENSG00000104904	OAZ1	19	2269598	3
ENSG00000235230	AC011542.1	19	2414256	3
ENSG00000178951	ZBTB7A	19	4045217	3
ENSG00000008382	MPND	19	4343556	3
ENSG00000171105	INSR	19	7112266	3
ENSG00000129354	AP1M2	19	10683347	3
ENSG00000012124	CD22	19	35820079	3
ENSG00000221258	AC011465.1	19	38544518	3
ENSG00000142539	SPIB	19	50922198	3
ENSG00000177732	SOX12	20	306239	3
ENSG00000125843	C20orf29	20	3801178	3
ENSG00000124243	BCAS4	20	49411431	3
ENSG00000218018	RP4-800J21.3	20	55959216	3
ENSG00000203896	LIME1	20	62366815	3
ENSG00000160221	C21orf33	21	45553487	3
ENSG00000100105	PATZ1	22	31721790	3
ENSG00000054611	TBC1D22A	22	47158518	3
ENSG00000189409	MMP23B	1	1567474	2
ENSG00000078369	GNB1	1	1716725	2
ENSG00000248957	AL109917.1	1	1815600	2
ENSG00000169885	CALML6	1	1846266	2
ENSG00000157873	TNFRSF14	1	2487078	2
ENSG00000131697	NPHP4	1	5922871	2
ENSG00000116288	PARK7	1	8014351	2
ENSG00000116649	SRM	1	11114641	2
ENSG00000116731	PRDM2	1	14026693	2
ENSG00000179743	RP11-169K16.9	1	16160974	2
ENSG00000132881	C1orf89	1	16555170	2
ENSG00000117148	ACTL8	1	18081808	2
ENSG00000127481	UBR4	1	19401000	2
ENSG00000127483	HP1BP3	1	21069154	2
ENSG00000247296	AL451000.1	1	23940283	2
ENSG00000117614	SYF2	1	25549170	2
ENSG00000117713	ARID1A	1	27022522	2
ENSG00000162511	LAPTM5	1	31205316	2
ENSG00000163866	C1orf212	1	35178338	2
ENSG00000116560	SFPQ	1	35641979	2
ENSG00000117016	RIMS3	1	41086351	2
ENSG00000065978	YBX1	1	43148098	2
ENSG00000196517	SLC6A9	1	44462155	2
ENSG00000186603	HPDL	1	45792545	2
ENSG00000182183	FAM159A	1	53099016	2
ENSG00000162377	C1orf163	1	53152508	2
ENSG00000162433	AK3L1	1	65613232	2
ENSG00000142864	SERBP1	1	67873493	2
ENSG00000171492	LRRC8D	1	90286604	2
ENSG00000154511	FAM69A	1	93307724	2
ENSG00000227963	RP5-1074L1.1	1	110828997	2
ENSG00000163125	RPRD2	1	150335567	2
ENSG00000143543	JTB	1	153946745	2
ENSG00000160710	ADAR	1	154554537	2
ENSG00000163344	PMVK	1	154897210	2
ENSG00000160767	FAM189B	1	155216996	2
ENSG00000224276	RP11-336K24.5	1	155961181	2
ENSG00000160783	PMF1	1	156182773	2
ENSG00000143294	PRCC	1	156720402	2
ENSG00000122224	LY9	1	160765896	2
ENSG00000162746	FCRLB	1	161691353	2
ENSG00000241666	RP3-455J7.4	1	167596622	2
ENSG00000116161	CACYBP	1	174968300	2
ENSG00000143333	RGS16	1	182567758	2
ENSG00000116679	IVNS1ABP	1	185265520	2
ENSG00000116747	TROVE2	1	193028552	2
ENSG00000143851	PTPN7	1	202116141	2
ENSG00000133056	PIK3C2B	1	204391756	2
ENSG00000242861	RP11-285F7.2	1	226028584	2
ENSG00000168159	RNF187	1	228674762	2
ENSG00000059588	TARBP1	1	234527059	2
ENSG00000168264	IRF2BP2	1	234740015	2
ENSG00000115758	ODC1	2	10580094	2
ENSG00000138031	ADCY3	2	25042038	2
ENSG00000158089	GALNT14	2	31133333	2
ENSG00000162959	MEMO1	2	32092878	2
ENSG00000230587	AC093609.1	2	43324884	2
ENSG00000143933	CALM2	2	47272677	2
ENSG00000170802	FOXN2	2	48541776	2
ENSG00000228590	AC007381.3	2	60577730	2
ENSG00000119866	BCL11A	2	60678302	2
ENSG00000082898	XPO1	2	61704984	2
ENSG00000226756	AC007365.3	2	64871746	2
ENSG00000246432	AC010913.1	2	73511662	2
ENSG00000168906	MAT2A	2	85766288	2
ENSG00000250759	AC012511.1	2	86200673	2
ENSG00000230006	AC096579.14	2	89065324	2
ENSG00000163126	ANKRD23	2	97490263	2
ENSG00000158417	EIF5B	2	99953816	2
ENSG00000135966	TGFBRAP1	2	105880871	2
ENSG00000227842	AC093166.2	2	112475085	2
ENSG00000188177	ZC3H6	2	113033171	2
ENSG00000234174	AC016683.5	2	113929112	2
ENSG00000144230	GPR17	2	128403569	2
ENSG00000173349	SFT2D3	2	128458597	2
ENSG00000115806	GORASP2	2	171784974	2
ENSG00000115827	DCAF17	2	172290727	2
ENSG00000091436	AC013461.1	2	173940442	2
ENSG00000222043	AC079305.10	2	178129087	2
ENSG00000077232	DNAJC10	2	183580999	2
ENSG00000170396	ZNF804A	2	185463093	2
ENSG00000201813	U6	2	196535096	2
ENSG00000115541	HSPE1	2	198364718	2
ENSG00000144579	CTDSP1	2	219262979	2
ENSG00000229525	AC053503.4	2	220253218	2
ENSG00000188760	TMEM198	2	220408385	2
ENSG00000169047	IRS1	2	227599757	2
ENSG00000177673	C2orf57	2	232457612	2
ENSG00000252010	SCARNA6	2	234184373	2
ENSG00000077044	DGKD	2	234263153	2
ENSG00000124831	LRRFIP1	2	238536219	2
ENSG00000144488	ESPNL	2	239008798	2
ENSG00000188542	DUSP28	2	241499471	2
ENSG00000233806	AC131097.3	2	242823514	2
ENSG00000157020	SEC13	3	10334815	2
ENSG00000231362	RP11-715I4.1	3	13094467	2
ENSG00000132182	NUP210	3	13357737	2
ENSG00000206560	ANKRD28	3	15708743	2
ENSG00000131378	RFTN1	3	16357352	2
ENSG00000197385	ZNF860	3	32023263	2
ENSG00000144655	CSRNP1	3	39183346	2
ENSG00000144659	SLC25A38	3	39424839	2
ENSG00000160796	NBEAL2	3	47021173	2
ENSG00000163832	C3orf75	3	47537130	2
ENSG00000173473	SMARCC1	3	47626762	2
ENSG00000164045	CDC25A	3	48198636	2
ENSG00000213689	TREX1	3	48506445	2
ENSG00000178149	DALRD3	3	49052921	2
ENSG00000068028	RASSF1	3	50367217	2
ENSG00000243989	ACY1	3	52017356	2
ENSG00000239732	TLR9	3	52255096	2
ENSG00000163930	BAP1	3	52435029	2
ENSG00000163946	C3orf63	3	56654160	2
ENSG00000163686	ABHD6	3	58223233	2
ENSG00000189283	FHIT	3	59735036	2
ENSG00000144749	LRIG1	3	66429221	2
ENSG00000176142	TMEM39A	3	119148347	2
ENSG00000145103	ILDR1	3	121706170	2
ENSG00000169714	CNBP	3	128886661	2
ENSG00000118007	STAG1	3	136055077	2
ENSG00000114120	SLC25A36	3	140660672	2
ENSG00000181744	C3orf58	3	143690640	2
ENSG00000243675	RP11-379F4.1	3	158481220	2
ENSG00000173905	GOLIM4	3	167726465	2
ENSG00000085274	MYNN	3	169490853	2
ENSG00000171757	LRRC34	3	169511216	2
ENSG00000177565	TBL1XR1	3	176737143	2
ENSG00000121864	ZNF639	3	179040779	2
ENSG00000242522	RP11-509E17.1	3	183266523	2
ENSG00000145191	EIF2B5	3	183852826	2
ENSG00000163882	POLR2H	3	184079506	2
ENSG00000236864	RP11-44H4.1	3	187650552	2
ENSG00000114315	HES1	3	193853934	2
ENSG00000173950	C3orf21	3	194789008	2
ENSG00000236844	AC091633.2	3	195281428	2
ENSG00000224614	AC124944.2	3	195634947	2
ENSG00000163961	RNF168	3	196195654	2
ENSG00000232065	AC023797.1	3	196358369	2
ENSG00000163964	PIGX	3	196366646	2
ENSG00000168884	TNIP2	4	2743375	2
ENSG00000132405	TBC1D14	4	6910969	2
ENSG00000249762	AC104650.2	4	8242571	2
ENSG00000168421	RHOH	4	40192673	2
ENSG00000188848	BEND4	4	42112955	2
ENSG00000132463	GRSF1	4	71681499	2
ENSG00000138668	HNRNPD	4	83273651	2
ENSG00000168152	THAP9	4	83821837	2
ENSG00000138795	LEF1	4	108968701	2
ENSG00000174749	C4orf32	4	113066553	2
ENSG00000150961	SEC24D	4	119643978	2
ENSG00000145391	SETD7	4	140417243	2
ENSG00000243175	RP11-58H15.1	4	144345906	2
ENSG00000121210	KIAA0922	4	154387498	2
ENSG00000049656	CLPTM1L	5	1317859	2
ENSG00000112941	POLS	5	6714718	2
ENSG00000154124	FAM105B	5	14664773	2
ENSG00000113460	BRIX1	5	34915481	2
ENSG00000177738	CTD-2201E18.3	5	43014516	2
ENSG00000068796	KIF2A	5	61601989	2
ENSG00000145741	BTF3	5	72794233	2
ENSG00000176055	MBLAC2	5	89754020	2
ENSG00000248489	CTD-2007H13.3	5	98264875	2
ENSG00000113368	LMNB1	5	126112315	2
ENSG00000186687	LYRM7	5	130506503	2
ENSG00000238160	AC116366.5	5	131755108	2
ENSG00000249073	CTD-2131I18.1	5	133249368	2
ENSG00000132570	PCBD2	5	134240596	2
ENSG00000120738	EGR1	5	137801179	2
ENSG00000171604	CXXC5	5	139026884	2
ENSG00000249526	CTB-35F21.1	5	139064230	2
ENSG00000155846	PPARGC1B	5	149109815	2
ENSG00000198624	CCDC69	5	150560613	2
ENSG00000155508	CNOT8	5	154238106	2
ENSG00000164330	EBF1	5	158122928	2
ENSG00000181163	NPM1	5	170814708	2
ENSG00000146083	RNF44	5	175953698	2
ENSG00000169220	RGS14	5	176784838	2
ENSG00000131188	PRR7	5	176873446	2
ENSG00000197451	HNRNPAB	5	177631508	2
ENSG00000248473	CTC-338M12.2	5	180618046	2
ENSG00000146063	TRIM41	5	180649499	2
ENSG00000232654	FAM136B	6	3045618	2
ENSG00000137285	TUBB2B	6	3224517	2
ENSG00000124785	NRN1	6	5998232	2
ENSG00000187461	C6orf114	6	13469507	2
ENSG00000112242	E2F3	6	20402398	2
ENSG00000182952	HMGN4	6	26538572	2
ENSG00000204252	HLA-DOA	6	32971955	2
ENSG00000096060	FKBP5	6	35541362	2
ENSG00000220349	RP3-431A14.4	6	36704827	2
ENSG00000137168	PPIL1	6	36822603	2
ENSG00000231102	RP11-298J23.5	6	41688134	2
ENSG00000236163	RP11-501I18.2	6	42756998	2
ENSG00000124688	MAD2L1BP	6	43597277	2
ENSG00000096384	HSP90AB1	6	44214824	2
ENSG00000249379	RP1-27K12.4	6	53367983	2
ENSG00000135316	SYNCRIP	6	86267696	2
ENSG00000203875	SNHG5	6	86386725	2
ENSG00000251241	AL132996.1	6	91054938	2
ENSG00000112297	AIM1	6	106959730	2
ENSG00000178409	BEND3	6	107386386	2
ENSG00000118689	FOXO3	6	108881038	2
ENSG00000135535	CD164	6	109687717	2
ENSG00000231889	RP3-487J7.2	6	111804744	2
ENSG00000056972	TRAF3IP2	6	111877657	2
ENSG00000111860	C6orf204	6	118781935	2
ENSG00000112306	RPS12	6	133135681	2
ENSG00000010818	HIVEP2	6	143072604	2
ENSG00000220347	RP11-230C9.1	6	156983184	2
ENSG00000175048	ZDHHC14	6	157802557	2
ENSG00000188451	RP1-274L14.2	6	158658368	2
ENSG00000239857	C7orf20	7	916189	2
ENSG00000231927	AC102953.6	7	1548291	2
ENSG00000106009	C7orf27	7	2577511	2
ENSG00000234708	AC006483.8	7	5553485	2
ENSG00000106415	GLCCI1	7	8008423	2
ENSG00000122545	SEPT7	7	35840542	2
ENSG00000196262	PPIA	7	44836279	2
ENSG00000136280	CCM2	7	45039074	2
ENSG00000200815	U6	7	50503078	2
ENSG00000154978	VOPP1	7	55503749	2
ENSG00000234444	ZNF736	7	63767837	2
ENSG00000158321	AUTS2	7	69063905	2
ENSG00000106683	LIMK1	7	73497263	2
ENSG00000127957	PMS2L3	7	75137069	2
ENSG00000237819	AC002454.1	7	92465797	2
ENSG00000130429	ARPC1B	7	98971872	2
ENSG00000221838	AP4M1	7	99699130	2
ENSG00000176125	UFSP1	7	100486346	2
ENSG00000239480	RP11-514P8.2	7	102067265	2
ENSG00000160991	ORAI2	7	102073553	2
ENSG00000091127	PUS7	7	105080108	2
ENSG00000242394	AC000123.2	7	126999839	2
ENSG00000122786	CALD1	7	134429003	2
ENSG00000122783	C7orf49	7	134777115	2
ENSG00000204947	ZNF425	7	148799876	2
ENSG00000170265	ZNF282	7	148892554	2
ENSG00000239377	RP4-584D14.6	7	150076943	2
ENSG00000249694	AC104021.1	8	2447078	2
ENSG00000158941	KIAA1967	8	22462257	2
ENSG00000240116	AC107959.2	8	22835390	2
ENSG00000092964	DPYSL2	8	26371842	2
ENSG00000186918	ZNF395	8	28203102	2
ENSG00000083168	MYST3	8	41786997	2
ENSG00000070718	AP3M2	8	42010464	2
ENSG00000120992	LYPLA1	8	54958939	2
ENSG00000205189	ZBTB10	8	81397902	2
ENSG00000070756	PABPC1	8	101715144	2
ENSG00000155090	KLF10	8	103661007	2
ENSG00000217620	AP003356.1	8	103819070	2
ENSG00000155096	AZIN1	8	103838536	2
ENSG00000164934	DCAF13	8	104427219	2
ENSG00000178764	ZHX2	8	123793901	2
ENSG00000173334	TRIB1	8	126442563	2
ENSG00000171045	TSNARE1	8	143293442	2
ENSG00000130193	C8orf55	8	143808621	2
ENSG00000231938	AC105118.1	8	144458848	2
ENSG00000178719	GRINA	8	145064226	2
ENSG00000179091	CYC1	8	145149960	2
ENSG00000167700	MFSD3	8	145734463	2
ENSG00000196150	ZNF250	8	146092748	2
ENSG00000222973	U2	9	2162763	2
ENSG00000086102	NFX1	9	33290509	2
ENSG00000107140	TESK1	9	35605367	2
ENSG00000131669	NINJ1	9	95883771	2
ENSG00000199165	hsa-let-7a-1	9	96938239	2
ENSG00000165244	ZNF367	9	99148223	2
ENSG00000136938	ANP32B	9	100745638	2
ENSG00000106785	TRIM14	9	100831557	2
ENSG00000119508	NR4A3	9	102584137	2
ENSG00000119318	RAD23B	9	110045418	2
ENSG00000228053	RP11-151F5.2	9	112787161	2
ENSG00000119408	NEK6	9	127019885	2
ENSG00000136950	ARPC5L	9	127624409	2
ENSG00000106991	ENG	9	130577291	2
ENSG00000226602	RP11-216B9.8	9	131448620	2
ENSG00000130713	EXOSC2	9	133569108	2
ENSG00000126882	FAM78A	9	134133463	2
ENSG00000130723	BAT2L	9	134269480	2
ENSG00000196990	FAM163B	9	136444072	2
ENSG00000165661	QSOX2	9	139098179	2
ENSG00000165689	SDCCAG3	9	139296377	2
ENSG00000228544	RP11-216L13.8	9	139698379	2
ENSG00000054148	PHPT1	9	139743176	2
ENSG00000108021	C10orf18	10	5726801	2
ENSG00000057608	GDI2	10	5807186	2
ENSG00000148429	USP6NL	10	11502509	2
ENSG00000183049	CAMK1D	10	12391481	2
ENSG00000152457	DCLRE1C	10	14939358	2
ENSG00000107897	ACBD5	10	27484144	2
ENSG00000151151	IPMK	10	59951278	2
ENSG00000156521	TYSND1	10	71897737	2
ENSG00000238446	U7	10	73604492	2
ENSG00000156110	ADK	10	75910987	2
ENSG00000182771	GRID1	10	87359312	2
ENSG00000095585	BLNK	10	97951013	2
ENSG00000155629	PIK3AP1	10	98353069	2
ENSG00000198728	LDB1	10	103867317	2
ENSG00000077150	NFKB2	10	104154229	2
ENSG00000228417	RP11-549L6.3	10	111967608	2
ENSG00000229668	RP11-317F20.2	10	116261756	2
ENSG00000148908	RGS10	10	121259340	2
ENSG00000151923	TIAL1	10	121334199	2
ENSG00000199466	Y_RNA	10	126454765	2
ENSG00000231705	RP11-432J24.2	10	134232587	2
ENSG00000177225	PDDC1	11	767225	2
ENSG00000177542	SLC25A22	11	790475	2
ENSG00000177830	CHID1	11	867860	2
ENSG00000078902	TOLLIP	11	1295601	2
ENSG00000238184	AC129929.5	11	2349979	2
ENSG00000205339	IPO7	11	9406169	2
ENSG00000243964	RP11-16F15.1	11	9627689	2
ENSG00000197601	FAR1	11	13690206	2
ENSG00000152219	C11orf46	11	30344656	2
ENSG00000060749	QSER1	11	32914792	2
ENSG00000135387	CAPRIN1	11	34073230	2
ENSG00000149182	ARFGAP2	11	47185854	2
ENSG00000165915	SLC39A13	11	47430051	2
ENSG00000109920	FNBP4	11	47738070	2
ENSG00000134802	SLC43A3	11	57174429	2
ENSG00000149150	SLC43A1	11	57252010	2
ENSG00000252893	U7	11	59326273	2
ENSG00000149016	TUT1	11	62327075	2
ENSG00000110583	NAA40	11	63706442	2
ENSG00000168439	STIP1	11	63953297	2
ENSG00000149781	FERMT3	11	63974152	2
ENSG00000173486	FKBP2	11	64008413	2
ENSG00000173153	ESRRA	11	64073044	2
ENSG00000068831	RASGRP2	11	64494383	2
ENSG00000162298	SYVN1	11	64894753	2
ENSG00000251562	MALAT1	11	65269807	2
ENSG00000142186	SCYL1	11	65292548	2
ENSG00000172803	SNX32	11	65601366	2
ENSG00000173621	LRFN4	11	66624589	2
ENSG00000173020	ADRBK1	11	67033905	2
ENSG00000132744	ACY3	11	67410029	2
ENSG00000132746	ALDH3B2	11	67429634	2
ENSG00000110057	UNC93B1	11	67758575	2
ENSG00000137522	RNF121	11	71639747	2
ENSG00000175581	MRPL48	11	73498917	2
ENSG00000175567	UCP2	11	73685716	2
ENSG00000152558	TMEM123	11	102267058	2
ENSG00000118058	MLL	11	118307205	2
ENSG00000239726	AP004609.2	11	118801921	2
ENSG00000109971	HSPA8	11	122928203	2
ENSG00000134910	STT3A	11	125462739	2
ENSG00000134954	ETS1	11	128328656	2
ENSG00000170322	NFRKB	11	129733671	2
ENSG00000149418	ST14	11	130029682	2
ENSG00000006831	ADIPOR2	12	1800193	2
ENSG00000151065	DCP1B	12	2055216	2
ENSG00000111640	GAPDH	12	6643093	2
ENSG00000139083	ETV6	12	11802788	2
ENSG00000177340	AC024940.1	12	31477423	2
ENSG00000151746	BICD1	12	32260182	2
ENSG00000189079	ARID2	12	46123492	2
ENSG00000139218	SFRS2IP	12	46315192	2
ENSG00000061273	HDAC7	12	48176505	2
ENSG00000123416	TUBA1B	12	49521569	2
ENSG00000167553	TUBA1C	12	49658865	2
ENSG00000012822	CALCOCO1	12	54104902	2
ENSG00000170515	PA2G4	12	56498103	2
ENSG00000135482	ZC3H10	12	56512030	2
ENSG00000196465	MYL6B	12	56546335	2
ENSG00000110958	PTGES3	12	57057127	2
ENSG00000166888	STAT6	12	57489195	2
ENSG00000185633	NDUFA4L2	12	57628688	2
ENSG00000111087	GLI1	12	57853934	2
ENSG00000135655	USP15	12	62654187	2
ENSG00000184575	XPOT	12	64798233	2
ENSG00000080371	RAB21	12	72148658	2
ENSG00000187109	NAP1L1	12	76438682	2
ENSG00000102189	EEA1	12	93166286	2
ENSG00000177889	UBE2N	12	93802090	2
ENSG00000218754	RPL18AP3	12	104659087	2
ENSG00000110876	SELPLG	12	109015686	2
ENSG00000174437	ATP2A2	12	110719032	2
ENSG00000186815	TPCN1	12	113659260	2
ENSG00000089094	KDM2B	12	121866902	2
ENSG00000182500	ORAI1	12	122064455	2
ENSG00000139725	RHOF	12	122215662	2
ENSG00000110987	BCL7A	12	122459861	2
ENSG00000139722	VPS37B	12	123349882	2
ENSG00000130921	C12orf65	12	123717463	2
ENSG00000139697	SBNO1	12	123780455	2
ENSG00000150977	RILPL2	12	123899588	2
ENSG00000196498	NCOR2	12	124808961	2
ENSG00000073060	SCARB1	12	125262186	2
ENSG00000132341	RAN	12	131356568	2
ENSG00000177192	PUS1	12	132413789	2
ENSG00000185684	EP400NL	12	132568828	2
ENSG00000186184	POLR1D	13	28194903	2
ENSG00000225039	RP11-223E19.2	13	30993656	2
ENSG00000236444	RP11-223E19.1	13	31002128	2
ENSG00000132952	USPL1	13	31191830	2
ENSG00000120688	WBP4	13	41635410	2
ENSG00000139684	ESD	13	47345391	2
ENSG00000136161	RCBTB2	13	49063095	2
ENSG00000231607	DLEU2	13	50601269	2
ENSG00000176124	DLEU1	13	50656307	2
ENSG00000102796	DHRS12	13	52342129	2
ENSG00000118922	KLF12	13	74260150	2
ENSG00000215417	MIR17HG (mir-17-92)	13	92000074	2
ENSG00000088451	TGDS	13	95226308	2
ENSG00000174405	LIG4	13	108859794	2
ENSG00000227352	RP11-551M15.4	13	111796652	2
ENSG00000100889	PCK2	14	24563368	2
ENSG00000100897	DCAF11	14	24583989	2
ENSG00000198604	BAZ1A	14	35221938	2
ENSG00000100906	NFKBIA	14	35870717	2
ENSG00000250548	AL355916.1	14	62023038	2
ENSG00000140009	ESR2	14	64693753	2
ENSG00000139990	DCAF5	14	69517638	2
ENSG00000100632	ERH	14	69846840	2
ENSG00000170348	TMED10	14	75598173	2
ENSG00000100591	AHSA1	14	77924402	2
ENSG00000247694	AL136040.1	14	81687562	2
ENSG00000119714	GPR68	14	91698877	2
ENSG00000100628	ASB2	14	94400499	2
ENSG00000187621	TCL6	14	96116835	2
ENSG00000200506	Y_RNA	14	100049354	2
ENSG00000249733	AL359682.1	14	101723669	2
ENSG00000170779	CDCA4	14	105475910	2
ENSG00000226174	RP11-521B24.1	14	105864920	2
ENSG00000134138	MEIS2	15	37183222	2
ENSG00000248508	AC021755.4	15	40331512	2
ENSG00000104081	BMF	15	40380091	2
ENSG00000128965	CHAC1	15	41245347	2
ENSG00000174197	MGA	15	41952610	2
ENSG00000181827	RFX7	15	56379666	2
ENSG00000140455	USP3	15	63796810	2
ENSG00000157734	SNX22	15	64443916	2
ENSG00000090470	PDCD7	15	65409717	2
ENSG00000103769	RAB11A	15	66161789	2
ENSG00000166938	DIS3L	15	66585555	2
ENSG00000128973	CLN6	15	68499330	2
ENSG00000103647	CORO2B	15	68871308	2
ENSG00000140332	TLE3	15	70340543	2
ENSG00000207965	hsa-mir-629	15	70371711	2
ENSG00000166233	ARIH1	15	72766667	2
ENSG00000140506	LMAN1L	15	75105057	2
ENSG00000138621	PPCDC	15	75315896	2
ENSG00000167173	C15orf39	15	75491233	2
ENSG00000140398	NEIL1	15	75639331	2
ENSG00000180953	ST20	15	80191185	2
ENSG00000235913	AC106028.2	15	93338877	2
ENSG00000173575	CHD2	15	93443419	2
ENSG00000183571	PGPEP1L	15	99511509	2
ENSG00000247392	AC015712.2	15	101433945	2
ENSG00000103152	MPG	16	127006	2
ENSG00000197562	RAB40C	16	640089	2
ENSG00000228201	AL022341.3	16	698473	2
ENSG00000206630	SNORD60	16	2205024	2
ENSG00000131650	KREMEN2	16	3014160	2
ENSG00000090447	TFAP4	16	4307187	2
ENSG00000126603	GLIS2	16	4364762	2
ENSG00000179583	CIITA	16	10971039	2
ENSG00000038532	CLEC16A	16	11038345	2
ENSG00000221801	hsa-mir-548h-2	16	11400297	2
ENSG00000155666	JMJD5	16	27214807	2
ENSG00000103522	IL21R	16	27413686	2
ENSG00000169180	XPO6	16	28109316	2
ENSG00000168488	ATXN2L	16	28834320	2
ENSG00000102879	CORO1A	16	30194892	2
ENSG00000180209	MYLPF	16	30386112	2
ENSG00000235560	AC002310.2	16	30546394	2
ENSG00000069345	DNAJA2	16	46989274	2
ENSG00000121281	ADCY7	16	50300478	2
ENSG00000125166	GOT2	16	58741035	2
ENSG00000067955	CBFB	16	67063050	2
ENSG00000038358	EDC4	16	67906975	2
ENSG00000168872	DDX19A	16	70380732	2
ENSG00000140943	MBTPS1	16	84087366	2
ENSG00000103168	TAF1C	16	84211461	2
ENSG00000140950	KIAA1609	16	84509966	2
ENSG00000131149	KIAA0182	16	85645023	2
ENSG00000103264	FBXO31	16	87362944	2
ENSG00000179588	ZFPM1	16	88519725	2
ENSG00000051523	CYBA	16	88709698	2
ENSG00000158717	RNF166	16	88762903	2
ENSG00000129993	CBFA2T3	16	88941266	2
ENSG00000185324	CDK10	16	89753078	2
ENSG00000075399	C16orf7	16	89773541	2
ENSG00000141002	TCF25	16	89939970	2
ENSG00000198211	TUBB3	16	89985667	2
ENSG00000235361	AC016292.1	17	1085187	2
ENSG00000182880	OR1D5	17	2965963	2
ENSG00000108518	PFN1	17	4848947	2
ENSG00000161960	EIF4A1	17	7476024	2
ENSG00000170004	CHD3	17	7788124	2
ENSG00000179094	PER1	17	8043809	2
ENSG00000205309	NT5M	17	17206649	2
ENSG00000237328	AC122129.3	17	17662468	2
ENSG00000072310	SREBF1	17	17714653	2
ENSG00000124422	USP22	17	20902906	2
ENSG00000154035	C17orf103	17	21142183	2
ENSG00000076604	TRAF4	17	27071036	2
ENSG00000005156	LIG3	17	33307542	2
ENSG00000179294	C17orf96	17	36827961	2
ENSG00000108292	MLLT6	17	36861795	2
ENSG00000141720	PIP5K2B	17	36921942	2
ENSG00000108298	RPL19	17	37356536	2
ENSG00000249524	AC079199.1	17	37916402	2
ENSG00000126368	NR1D1	17	38249040	2
ENSG00000013306	SLC25A39	17	42396993	2
ENSG00000172992	DCAKD	17	43100710	2
ENSG00000214401	AC217773.2	17	44270940	2
ENSG00000108424	KPNB1	17	45727275	2
ENSG00000159217	IGF2BP1	17	47074774	2
ENSG00000108798	ABI3	17	47287589	2
ENSG00000108819	PPP1R9B	17	48211104	2
ENSG00000229980	AC091062.2	17	48944040	2
ENSG00000136450	SFRS1	17	56078284	2
ENSG00000108389	MTMR4	17	56566893	2
ENSG00000136490	LIMD2	17	61773250	2
ENSG00000007312	CD79B	17	62006100	2
ENSG00000108622	ICAM2	17	62079956	2
ENSG00000120063	GNA13	17	63005407	2
ENSG00000154217	PITPNC1	17	65373924	2
ENSG00000182481	KPNA2	17	66031848	2
ENSG00000252545	U6	17	73027192	2
ENSG00000125454	SLC25A19	17	73269062	2
ENSG00000108479	GALK1	17	73754018	2
ENSG00000132471	WBP2	17	73841780	2
ENSG00000129667	RHBDF2	17	74466976	2
ENSG00000250233	AC015802.2	17	74485424	2
ENSG00000229070	AC111170.2	17	75440786	2
ENSG00000250022	AC111170.2	17	75464643	2
ENSG00000167895	TMC8	17	76126859	2
ENSG00000225663	FAM195B	17	79780293	2
ENSG00000244773	AC132872.4	17	80247922	2
ENSG00000141568	FOXK2	17	80477591	2
ENSG00000238863	snoU13	18	3424257	2
ENSG00000178127	NDUFV2	18	9102628	2
ENSG00000141391	SLMO1	18	12407895	2
ENSG00000085415	SEH1L	18	12947983	2
ENSG00000134758	RNF138	18	29671828	2
ENSG00000152242	C18orf25	18	43753988	2
ENSG00000175387	SMAD2	18	45357922	2
ENSG00000101665	SMAD7	18	46446223	2
ENSG00000176624	MEX3C	18	48700920	2
ENSG00000134440	NARS	18	55267896	2
ENSG00000141664	ZCCHC2	18	60190658	2
ENSG00000206029	AC116904.1	18	72260074	2
ENSG00000130856	ZNF236	18	74536116	2
ENSG00000178412	AC068473.1	18	77398938	2
ENSG00000101546	C18orf22	18	77794358	2
ENSG00000011304	PTBP1	19	797392	2
ENSG00000180448	HMHA1	19	1066025	2
ENSG00000226593	AC004258.1	19	1275520	2
ENSG00000071626	DAZAP1	19	1407584	2
ENSG00000071564	TCF3	19	1609293	2
ENSG00000227500	SCAMP4	19	1905371	2
ENSG00000172081	MOBKL2A	19	2071037	2
ENSG00000176619	LMNB2	19	2428164	2
ENSG00000141873	SLC39A3	19	2732525	2
ENSG00000167658	EEF2	19	3976055	2
ENSG00000127663	KDM4B	19	4969124	2
ENSG00000088247	KHSRP	19	6413121	2
ENSG00000228975	AC119396.1	19	7427666	2
ENSG00000175898	S1PR2	19	10332109	2
ENSG00000090339	ICAM1	19	10381517	2
ENSG00000065989	PDE4A	19	10527619	2
ENSG00000129351	ILF3	19	10764937	2
ENSG00000127616	SMARCA4	19	11071598	2
ENSG00000242219	AC011442.1	19	11122384	2
ENSG00000173928	C19orf39	19	11485383	2
ENSG00000105576	TNPO2	19	12810008	2
ENSG00000171223	JUNB	19	12902310	2
ENSG00000179218	CALR	19	13049414	2
ENSG00000104903	LYL1	19	13209848	2
ENSG00000123136	DDX39	19	14519633	2
ENSG00000105127	AKAP8	19	15464341	2
ENSG00000011243	AKAP8L	19	15490859	2
ENSG00000167461	RAB8A	19	16222490	2
ENSG00000127527	EPS15L1	19	16466220	2
ENSG00000160117	ANKLE1	19	17392454	2
ENSG00000130312	MRPL34	19	17416477	2
ENSG00000105643	ARRDC2	19	18111944	2
ENSG00000130513	GDF15	19	18496968	2
ENSG00000130511	SSBP4	19	18530136	2
ENSG00000006015	C19orf60	19	18699495	2
ENSG00000064545	TMEM161A	19	19230429	2
ENSG00000129933	KIAA0892	19	19431614	2
ENSG00000167491	GATAD2A	19	19496639	2
ENSG00000105216	LSM14A	19	34663352	2
ENSG00000105220	GPI	19	34855815	2
ENSG00000126247	CAPNS1	19	36630918	2
ENSG00000104824	HNRNPL	19	39327029	2
ENSG00000187994	RINL	19	39358470	2
ENSG00000128016	ZFP36	19	39897453	2
ENSG00000105245	NUMBL	19	41171810	2
ENSG00000171570	EGLN2	19	41305048	2
ENSG00000142039	CCDC97	19	41816094	2
ENSG00000105329	TGFB1	19	41836651	2
ENSG00000235187	AC010616.1	19	42413527	2
ENSG00000028277	POU2F2	19	42592675	2
ENSG00000204957	AC006486.1	19	42746927	2
ENSG00000012061	ERCC1	19	45912872	2
ENSG00000125746	EML2	19	46112660	2
ENSG00000011485	PPP5C	19	46850294	2
ENSG00000105281	SLC1A5	19	47278140	2
ENSG00000130749	ZC3H4	19	47567449	2
ENSG00000142227	EMP3	19	48828629	2
ENSG00000087086	FTL	19	49468566	2
ENSG00000105063	SAPS1	19	55741148	2
ENSG00000171443	ZNF524	19	56111730	2
ENSG00000142409	ZNF787	19	56598732	2
ENSG00000177764	ZCCHC3	20	278204	2
ENSG00000101255	TRIB3	20	361261	2
ENSG00000132670	PTPRA	20	2844830	2
ENSG00000125772	GPCPD1	20	5525081	2
ENSG00000149346	C20orf94	20	10415951	2
ENSG00000130684	ZNF337	20	25654851	2
ENSG00000125968	ID1	20	30193086	2
ENSG00000245977	AL133343.1	20	31097762	2
ENSG00000101412	E2F1	20	32263489	2
ENSG00000125970	RALY	20	32581452	2
ENSG00000061656	SPAG4	20	34203814	2
ENSG00000149639	C20orf117	20	35405845	2
ENSG00000101057	MYBL2	20	42295797	2
ENSG00000230043	TMSL6	20	49457152	2
ENSG00000101126	ADNP	20	49505585	2
ENSG00000101096	NFATC2	20	50003494	2
ENSG00000132819	RBM38	20	55966463	2
ENSG00000124227	ANKRD60	20	56793551	2
ENSG00000149657	LSM14B	20	60697517	2
ENSG00000226094	RPL7P3	20	61169878	2
ENSG00000101191	DIDO1	20	61509090	2
ENSG00000101194	SLC17A9	20	61584052	2
ENSG00000232442	CTD-3184A7.4	20	62258580	2
ENSG00000183260	C20orf135	20	62492851	2
ENSG00000237371	RP13-152O15.5	20	62688156	2
ENSG00000248681	CR381670.1	21	9738602	2
ENSG00000156273	BACH1	21	30671192	2
ENSG00000237594	AP000251.2	21	32931537	2
ENSG00000159140	SON	21	34914924	2
ENSG00000157538	DSCR3	21	38591910	2
ENSG00000184385	C21orf128	21	43522244	2
ENSG00000231867	AP001625.5	21	43928734	2
ENSG00000239415	AP001469.9	21	47671463	2
ENSG00000015475	BID	22	18216906	2
ENSG00000184470	TXNRD2	22	19863040	2
ENSG00000128266	GNAZ	22	23412540	2
ENSG00000236794	U07000.5	22	23522106	2
ENSG00000099991	CABIN1	22	24407642	2
ENSG00000241878	PISD	22	32014477	2
ENSG00000100320	RBM9	22	36134783	2
ENSG00000100345	MYH9	22	36677327	2
ENSG00000100060	MFNG	22	37865103	2
ENSG00000248512	AL035496.1	22	38004868	2
ENSG00000183741	CBX6	22	39257455	2
ENSG00000100335	SMCR7L	22	39895437	2
ENSG00000187051	RPS19BP1	22	39925098	2
ENSG00000100403	ZC3H7B	22	41697526	2
ENSG00000183864	TOB2	22	41829496	2
ENSG00000159958	TNFRSF13C	22	42321045	2
ENSG00000100162	CENPM	22	42334725	2
ENSG00000250278	Z99716.2	22	42335060	2
ENSG00000248178	AL049757.2	22	43111862	2
ENSG00000226328	CTA-217C2.1	22	45529710	2
ENSG00000100416	TRMU	22	46726772	2
ENSG00000198355	PIM3	22	50354161	2
ENSG00000170638	TRABD	22	50624344	2
ENSG00000073464	CLCN4	X	10125024	2
ENSG00000186312	CA5BP	X	15693039	2
ENSG00000238123	RP4-646N3.3	X	38660821	2
ENSG00000242892	XX-FW83563B9.5	X	153625219	2
ENSG00000188976	NOC2L	1	879584	1
ENSG00000187608	ISG15	1	948803	1
ENSG00000131591	C1orf159	1	1017198	1
ENSG00000223823	RP11-465B22.5	1	1072397	1
ENSG00000176022	B3GALT6	1	1167629	1
ENSG00000169972	PUSL1	1	1243947	1
ENSG00000127054	CPSF3L	1	1246969	1
ENSG00000175756	AURKAIP1	1	1309110	1
ENSG00000221978	CCNL2	1	1321091	1
ENSG00000242485	MRPL20	1	1337288	1
ENSG00000179403	VWA1	1	1370241	1
ENSG00000160072	ATAD3B	1	1407143	1
ENSG00000197785	ATAD3A	1	1447531	1
ENSG00000160075	SSU72	1	1477053	1
ENSG00000197530	MIB2	1	1550801	1
ENSG00000189339	RP11-345P4.4	1	1592939	1
ENSG00000008130	NADK	1	1682671	1
ENSG00000231050	RP1-140A9.1	1	1822910	1
ENSG00000157911	PEX10	1	2336236	1
ENSG00000229393	RP3-395M20.3	1	2424876	1
ENSG00000157870	C1orf93	1	2517930	1
ENSG00000078900	TP73	1	3569084	1
ENSG00000235169	RP1-286D6.2	1	3689352	1
ENSG00000130764	LRRC47	1	3696784	1
ENSG00000236423	RP13-15E13.1	1	3816936	1
ENSG00000158286	RNF207	1	6265535	1
ENSG00000116237	ICMT	1	6281252	1
ENSG00000097021	ACOT7	1	6324333	1
ENSG00000069812	HES2	1	6472478	1
ENSG00000215788	TNFRSF25	1	6521211	1
ENSG00000162408	NOL9	1	6581407	1
ENSG00000204859	ZBTB48	1	6640061	1
ENSG00000250449	AL591866.2	1	6653265	1
ENSG00000116273	PHF13	1	6673745	1
ENSG00000007923	DNAJC11	1	6694228	1
ENSG00000237436	RP11-312B8.1	1	6843952	1
ENSG00000234619	RP4-633I8.1	1	8810489	1
ENSG00000074800	ENO1	1	8921061	1
ENSG00000236269	RP3-477M7.2	1	8935847	1
ENSG00000252404	SCARNA16	1	9142755	1
ENSG00000252956	5S_rRNA	1	9497728	1
ENSG00000171612	SLC25A33	1	9599541	1
ENSG00000171608	PIK3CD	1	9711803	1
ENSG00000162441	LZIC	1	9982171	1
ENSG00000251503	RP5-1113E3.5	1	10490159	1
ENSG00000142655	PEX14	1	10532345	1
ENSG00000120948	TARDBP	1	11072414	1
ENSG00000120942	UBIAD1	1	11333263	1
ENSG00000132879	FBXO44	1	11714432	1
ENSG00000177674	AGTRAP	1	11796141	1
ENSG00000215910	C1orf167	1	11821844	1
ENSG00000242349	NPPAAS	1	11901074	1
ENSG00000083444	PLOD1	1	11994262	1
ENSG00000116688	MFN2	1	12040238	1
ENSG00000116691	MIIP	1	12079523	1
ENSG00000227612	RP5-1177E19.2	1	14104760	1
ENSG00000142634	EFHD2	1	15736391	1
ENSG00000116138	DNAJC16	1	15853308	1
ENSG00000116771	AGMAT	1	15898848	1
ENSG00000197312	DDI2	1	15943995	1
ENSG00000178715	RP11-169K16.8	1	16154727	1
ENSG00000142632	ARHGEF19	1	16524349	1
ENSG00000226457	RP11-430L17.1	1	16695645	1
ENSG00000157191	NECAP2	1	16767167	1
ENSG00000219481	NBPF1	1	16888818	1
ENSG00000117118	SDHB	1	17345217	1
ENSG00000179051	RCC2	1	17733256	1
ENSG00000127463	KIAA0090	1	19542158	1
ENSG00000040487	PQLC2	1	19638740	1
ENSG00000077549	CAPZB	1	19665270	1
ENSG00000173436	C1orf151	1	19923477	1
ENSG00000158828	PINK1	1	20959948	1
ENSG00000075151	EIF4G3	1	21132972	1
ENSG00000090686	USP48	1	22004791	1
ENSG00000232037	RP11-26H16.1	1	22234591	1
ENSG00000070831	CDC42	1	22379120	1
ENSG00000184677	ZBTB40	1	22778344	1
ENSG00000004487	KDM1A	1	23345941	1
ENSG00000125944	HNRNPR	1	23630264	1
ENSG00000187251	C1orf213	1	23695464	1
ENSG00000088280	ASAP3	1	23755055	1
ENSG00000235052	RP1-150O5.3	1	23875630	1
ENSG00000117318	ID3	1	23884409	1
ENSG00000197880	MDS2	1	23907985	1
ENSG00000142676	RPL11	1	24018269	1
ENSG00000011007	TCEB3	1	24069645	1
ENSG00000011009	LYPLA2	1	24117460	1
ENSG00000117308	GALE	1	24122089	1
ENSG00000189266	PNRC2	1	24285599	1
ENSG00000188529	SFRS13A	1	24291294	1
ENSG00000142677	IL22RA1	1	24446261	1
ENSG00000185436	IL28RA	1	24480647	1
ENSG00000230023	RP11-10N16.2	1	24526730	1
ENSG00000001461	NIPAL3	1	24742284	1
ENSG00000133226	SRRM1	1	24958207	1
ENSG00000188672	RHCE	1	25688741	1
ENSG00000157978	LDLRAP1	1	25870071	1
ENSG00000225643	RP11-70P17.1	1	25907969	1
ENSG00000127423	C1orf135	1	26160497	1
ENSG00000117632	STMN1	1	26212214	1
ENSG00000158006	PAFAH2	1	26286258	1
ENSG00000175087	PDIK1L	1	26437664	1
ENSG00000142684	ZNF593	1	26496362	1
ENSG00000130695	CCDC21	1	26560691	1
ENSG00000142669	SH3BGRL3	1	26605667	1
ENSG00000169442	CD52	1	26644448	1
ENSG00000225854	RP11-569G9.7	1	26653178	1
ENSG00000117682	DHDDS	1	26758773	1
ENSG00000198830	HMGN2	1	26798941	1
ENSG00000224129	RP11-492M19.1	1	26845845	1
ENSG00000117676	RPS6KA1	1	26856258	1
ENSG00000229247	RP11-492M19.3	1	26966868	1
ENSG00000251227	AL512408.1	1	27044485	1
ENSG00000060642	PIGV	1	27113963	1
ENSG00000175793	SFN	1	27189653	1
ENSG00000131910	NR0B2	1	27237980	1
ENSG00000186501	TMEM222	1	27648636	1
ENSG00000241169	RP4-752I6.1	1	27783709	1
ENSG00000237429	RP1-159A19.4	1	27852316	1
ENSG00000000938	FGR	1	27938575	1
ENSG00000117748	RPA2	1	28218035	1
ENSG00000158161	EYA3	1	28296855	1
ENSG00000130772	MED18	1	28655513	1
ENSG00000238821	snoU13	1	28843988	1
ENSG00000180098	TRNAU1AP	1	28879597	1
ENSG00000207070	SNORA16	1	28907432	1
ENSG00000120656	TAF12	1	28915835	1
ENSG00000198492	YTHDF2	1	29063133	1
ENSG00000116353	MECR	1	29519385	1
ENSG00000186056	RP5-1166H10.2	1	31190940	1
ENSG00000134644	PUM1	1	31404353	1
ENSG00000225142	RP11-490K7.1	1	31580995	1
ENSG00000168528	SERINC2	1	31882412	1
ENSG00000228682	RP11-439L8.3	1	31971841	1
ENSG00000162517	PEF1	1	32095463	1
ENSG00000121753	BAI2	1	32192718	1
ENSG00000184007	PTP4A2	1	32372022	1
ENSG00000121774	KHDRBS1	1	32479430	1
ENSG00000203325	RP11-277A4.4	1	32517892	1
ENSG00000025800	KPNA6	1	32573639	1
ENSG00000084652	TXLNA	1	32645287	1
ENSG00000160055	C1orf91	1	32680073	1
ENSG00000182866	LCK	1	32716840	1
ENSG00000116478	HDAC1	1	32757687	1
ENSG00000231176	RP4-811H24.10	1	32816855	1
ENSG00000224333	GAPDHP20	1	32867710	1
ENSG00000176261	ZBTB8OS	1	33065854	1
ENSG00000116497	S100PBP	1	33283043	1
ENSG00000004455	AK2	1	33473585	1
ENSG00000142920	ADC	1	33546705	1
ENSG00000233246	RP11-415J8.5	1	33815953	1
ENSG00000146463	ZMYM4	1	35734568	1
ENSG00000142687	KIAA0319L	1	35899091	1
ENSG00000126067	PSMB2	1	36042938	1
ENSG00000126070	EIF2C3	1	36396319	1
ENSG00000116863	ADPRHL2	1	36554476	1
ENSG00000171812	COL8A2	1	36560837	1
ENSG00000054116	TRAPPC3	1	36602173	1
ENSG00000116871	MAP7D1	1	36621194	1
ENSG00000054118	THRAP3	1	36690017	1
ENSG00000196182	STK40	1	36805225	1
ENSG00000181817	LSM10	1	36856839	1
ENSG00000116898	MRPS15	1	36921319	1
ENSG00000234481	RP4-614N24.1	1	37238741	1
ENSG00000163873	GRIK3	1	37261128	1
ENSG00000163875	MEAF6	1	37951915	1
ENSG00000134697	GNL2	1	38032417	1
ENSG00000116922	C1orf109	1	38147242	1
ENSG00000134690	CDCA8	1	38158090	1
ENSG00000185090	MANEAL	1	38259542	1
ENSG00000196449	YRDC	1	38268616	1
ENSG00000188786	MTF1	1	38279851	1
ENSG00000204084	INPP5B	1	38326369	1
ENSG00000183431	SF3A3	1	38422647	1
ENSG00000183520	UTP11L	1	38474930	1
ENSG00000238063	RP11-329N22.1	1	38940868	1
ENSG00000116954	RRAGC	1	39303870	1
ENSG00000168653	NDUFS5	1	39491990	1
ENSG00000090621	PABPC4	1	40026485	1
ENSG00000116985	BMP8B	1	40222854	1
ENSG00000229213	RP1-118J21.24	1	40261515	1
ENSG00000043514	TRIT1	1	40306708	1
ENSG00000168389	MFSD2A	1	40420802	1
ENSG00000228477	RP3-342P20.2	1	40428352	1
ENSG00000131236	CAP1	1	40505905	1
ENSG00000131238	PPT1	1	40538377	1
ENSG00000117000	RLF	1	40627045	1
ENSG00000084073	ZMPSTE24	1	40723779	1
ENSG00000049089	COL9A2	1	40766159	1
ENSG00000187801	ZNF643	1	40915771	1
ENSG00000187815	ZNF642	1	40942887	1
ENSG00000066136	NFYC	1	41157242	1
ENSG00000171793	CTPS	1	41445007	1
ENSG00000247823	AL110502.1	1	41480262	1
ENSG00000010803	SCMH1	1	41492874	1
ENSG00000235358	RP11-399E6.1	1	41708045	1
ENSG00000230638	RP11-486B10.4	1	42007739	1
ENSG00000198815	FOXJ3	1	42642210	1
ENSG00000177181	RIMKLA	1	42846466	1
ENSG00000171960	PPIH	1	43124048	1
ENSG00000164008	C1orf50	1	43232940	1
ENSG00000243710	WDR65	1	43638026	1
ENSG00000126091	ST3GAL3	1	44173216	1
ENSG00000237950	RP11-7O11.3	1	44410042	1
ENSG00000132768	DPH2	1	44435653	1
ENSG00000117410	ATP6V0B	1	44440617	1
ENSG00000117411	B4GALT2	1	44444615	1
ENSG00000159214	CCDC24	1	44457031	1
ENSG00000178028	DMAP1	1	44679127	1
ENSG00000117419	ERI3	1	44686742	1
ENSG00000126106	TMEM53	1	45100910	1
ENSG00000199377	U5	1	45187458	1
ENSG00000225721	RP11-269F19.2	1	45224709	1
ENSG00000142959	BEST4	1	45249257	1
ENSG00000173846	PLK3	1	45265897	1
ENSG00000222009	BTBD19	1	45274154	1
ENSG00000070785	EIF2B3	1	45316450	1
ENSG00000246279	AL359540.1	1	45769863	1
ENSG00000132781	MUTYH	1	45794914	1
ENSG00000132763	MMACHC	1	45965725	1
ENSG00000117450	PRDX1	1	45976708	1
ENSG00000117448	AKR1A1	1	46016215	1
ENSG00000159592	GPBP1L1	1	46092976	1
ENSG00000159596	TMEM69	1	46152886	1
ENSG00000227857	RP4-533D7.5	1	46599043	1
ENSG00000132128	LRRC41	1	46726868	1
ENSG00000117481	NSUN4	1	46805849	1
ENSG00000159658	KIAA0494	1	47140831	1
ENSG00000162368	CMPK1	1	47799469	1
ENSG00000186564	FOXD2	1	47901689	1
ENSG00000185104	FAF1	1	50905150	1
ENSG00000123080	CDKN2C	1	51426417	1
ENSG00000227070	RP11-191G24.1	1	51983981	1
ENSG00000212624	SNORA26	1	52190447	1
ENSG00000078618	NRD1	1	52254863	1
ENSG00000117862	TXNDC12	1	52485803	1
ENSG00000198841	KTI12	1	52497775	1
ENSG00000162384	C1orf123	1	53679771	1
ENSG00000226754	RP5-1024G6.5	1	53704282	1
ENSG00000157193	LRP8	1	53711212	1
ENSG00000058804	TMEM48	1	54231133	1
ENSG00000116209	TMEM59	1	54497347	1
ENSG00000215883	CYB5RL	1	54609065	1
ENSG00000243725	TTC4	1	55181495	1
ENSG00000162396	PARS2	1	55222571	1
ENSG00000242396	RP11-67L3.5	1	55352548	1
ENSG00000162402	USP24	1	55532032	1
ENSG00000162607	USP1	1	62901968	1
ENSG00000125703	ATG4C	1	63249806	1
ENSG00000088035	ALG6	1	63833261	1
ENSG00000142856	ITGB3BP	1	63906441	1
ENSG00000203965	EFCAB7	1	63989013	1
ENSG00000116675	DNAJC6	1	65713902	1
ENSG00000118473	SGIP1	1	66999066	1
ENSG00000198160	MIER1	1	67390640	1
ENSG00000116704	SLC35D1	1	67465015	1
ENSG00000066557	LRRC40	1	70610488	1
ENSG00000228988	RP4-677H15.4	1	70684272	1
ENSG00000137955	RABGGTB	1	76251882	1
ENSG00000036549	ZZZ3	1	78028101	1
ENSG00000162613	FUBP1	1	78400603	1
ENSG00000142875	PRKACB	1	84543745	1
ENSG00000203943	SAMD13	1	84764049	1
ENSG00000117133	RPF1	1	84944942	1
ENSG00000117155	SSX2IP	1	85109390	1
ENSG00000153898	MCOLN2	1	85391267	1
ENSG00000097096	SYDE2	1	85623356	1
ENSG00000117174	ZNHIT6	1	86118491	1
ENSG00000097033	SH3GLB1	1	87170259	1
ENSG00000065243	PKN2	1	89149905	1
ENSG00000137947	GTF2B	1	89318615	1
ENSG00000197147	LRRC8B	1	89990395	1
ENSG00000228175	GEMIN8P4	1	90459152	1
ENSG00000122482	ZNF644	1	91380859	1
ENSG00000097046	CDC7	1	91966404	1
ENSG00000122484	RPAP2	1	92764522	1
ENSG00000162676	GFI1	1	92940319	1
ENSG00000067208	EVI5	1	92974253	1
ENSG00000122406	RPL5	1	93297597	1
ENSG00000239710	AC093577.7	1	93440385	1
ENSG00000143033	MTF2	1	93544795	1
ENSG00000117505	DR1	1	93811445	1
ENSG00000211575	hsa-mir-760	1	94312388	1
ENSG00000067334	DNTTIP2	1	94331839	1
ENSG00000023909	GCLM	1	94350761	1
ENSG00000172339	ALG14	1	95448297	1
ENSG00000162688	AGL	1	100315640	1
ENSG00000228084	RP5-884G6.2	1	100433939	1
ENSG00000156875	HIAT1	1	100503653	1
ENSG00000156876	SASS6	1	100549119	1
ENSG00000117543	DPH5	1	101455179	1
ENSG00000198890	PRMT6	1	107599301	1
ENSG00000162639	C1orf59	1	109190912	1
ENSG00000134186	PRPF38B	1	109234945	1
ENSG00000121940	CLCC1	1	109472130	1
ENSG00000197780	TAF13	1	109605121	1
ENSG00000215717	TMEM167B	1	109630883	1
ENSG00000238881	snoU2-25	1	109642815	1
ENSG00000031698	SARS	1	109756540	1
ENSG00000143106	PSMA5	1	109944470	1
ENSG00000162650	ATXN7L2	1	110026101	1
ENSG00000174151	CYB561D1	1	110036658	1
ENSG00000116337	AMPD2	1	110162459	1
ENSG00000224927	RP4-735C1.5	1	110353266	1
ENSG00000143093	FAM40A	1	110574199	1
ENSG00000116396	KCNC4	1	110753965	1
ENSG00000134248	HBXIP	1	110943871	1
ENSG00000156171	DRAM2	1	111659955	1
ENSG00000162777	DENND2D	1	111729796	1
ENSG00000116455	WDR77	1	111982512	1
ENSG00000197852	C1orf183	1	112264686	1
ENSG00000134245	WNT2B	1	113009163	1
ENSG00000116489	CAPZA1	1	113161795	1
ENSG00000226419	RP11-31F15.1	1	113499037	1
ENSG00000248536	AL137856.1	1	114375710	1
ENSG00000118655	DCLRE1B	1	114447763	1
ENSG00000235527	RP5-1073O3.7	1	114466622	1
ENSG00000197323	TRIM33	1	114935399	1
ENSG00000213281	NRAS	1	115247090	1
ENSG00000009307	CSDE1	1	115259534	1
ENSG00000052723	SIKE1	1	115312100	1
ENSG00000163399	ATP1A1	1	116915290	1
ENSG00000116830	TTF2	1	117602925	1
ENSG00000198162	MAN1A2	1	117910071	1
ENSG00000065183	WDR3	1	118472347	1
ENSG00000116874	WARS2	1	119573839	1
ENSG00000092621	PHGDH	1	120202421	1
ENSG00000201699	U1	1	144534038	1
ENSG00000222788	U2	1	144944672	1
ENSG00000201558	U1	1	145382757	1
ENSG00000117289	TXNIP	1	145438469	1
ENSG00000181039	ANKRD34A	1	145470508	1
ENSG00000131795	RBM8A	1	145507598	1
ENSG00000211451	GNRHR2	1	145509752	1
ENSG00000186364	NUDT17	1	145586115	1
ENSG00000186141	POLR3C	1	145592605	1
ENSG00000230832	RP11-325P15.2	1	146553887	1
ENSG00000131791	PRKAB2	1	146626685	1
ENSG00000131778	CHD1L	1	146714291	1
ENSG00000136631	VPS45	1	150039342	1
ENSG00000143401	ANP32E	1	150190717	1
ENSG00000117362	APH1A	1	150237799	1
ENSG00000187145	MRPS21	1	150266289	1
ENSG00000117360	PRPF3	1	150293925	1
ENSG00000143374	TARS2	1	150459890	1
ENSG00000237781	RP11-54A4.2	1	150521040	1
ENSG00000203804	C1orf138	1	150532678	1
ENSG00000143420	ENSA	1	150573327	1
ENSG00000143379	SETDB1	1	150898767	1
ENSG00000143418	LASS2	1	150933059	1
ENSG00000197622	CDC42SE1	1	151023447	1
ENSG00000143458	GABPB2	1	151043054	1
ENSG00000163155	LYSMD1	1	151132222	1
ENSG00000163159	VPS72	1	151142463	1
ENSG00000159352	PSMD4	1	151227179	1
ENSG00000143373	ZNF687	1	151254094	1
ENSG00000237976	RP11-126K1.6	1	151319443	1
ENSG00000250734	RP11-404E16.1	1	151584514	1
ENSG00000159445	THEM4	1	151846060	1
ENSG00000238279	BX470102.3	1	153506079	1
ENSG00000189171	S100A13	1	153591263	1
ENSG00000143621	ILF2	1	153634512	1
ENSG00000143624	INTS3	1	153700543	1
ENSG00000207039	Y_RNA	1	153758196	1
ENSG00000143614	GATAD2B	1	153777201	1
ENSG00000198837	DENND4B	1	153901977	1
ENSG00000143578	CREB3L4	1	153940010	1
ENSG00000177954	RPS27	1	153963235	1
ENSG00000143612	C1orf43	1	154179196	1
ENSG00000160714	UBE2Q1	1	154521053	1
ENSG00000233875	RP11-61L14.6	1	154551541	1
ENSG00000143603	KCNN3	1	154679902	1
ENSG00000173207	CKS1B	1	154947129	1
ENSG00000160688	FLAD1	1	154955814	1
ENSG00000143537	ADAM15	1	155023177	1
ENSG00000163463	KRTCAP2	1	155141884	1
ENSG00000208011	hsa-mir-92b	1	155164968	1
ENSG00000169231	THBS3	1	155165379	1
ENSG00000160766	GBAP	1	155183616	1
ENSG00000177628	GBA	1	155204243	1
ENSG00000116521	SCAMP3	1	155225770	1
ENSG00000143630	HCN3	1	155247374	1
ENSG00000160752	FDPS	1	155278539	1
ENSG00000225855	C1orf104	1	155286654	1
ENSG00000116539	ASH1L	1	155305059	1
ENSG00000125459	MSTO1	1	155579996	1
ENSG00000132680	KIAA0907	1	155882834	1
ENSG00000160803	UBQLN4	1	156005092	1
ENSG00000116586	ROBLD3	1	156024543	1
ENSG00000160789	LMNA	1	156052364	1
ENSG00000198952	SMG5	1	156219015	1
ENSG00000163467	C1orf182	1	156307105	1
ENSG00000236947	RP11-98G7.1	1	156416204	1
ENSG00000206651	Y_RNA	1	156453890	1
ENSG00000160818	GPATCH4	1	156564279	1
ENSG00000143303	C1orf66	1	156698234	1
ENSG00000143314	MRPL24	1	156707095	1
ENSG00000143321	HDGF	1	156711899	1
ENSG00000198400	NTRK1	1	156785448	1
ENSG00000117036	ETV3	1	157090983	1
ENSG00000163534	FCRL1	1	157764193	1
ENSG00000163565	IFI16	1	158969758	1
ENSG00000158710	TAGLN2	1	159887897	1
ENSG00000162729	IGSF8	1	160061130	1
ENSG00000018625	ATP1A2	1	160085549	1
ENSG00000117091	CD48	1	160648536	1
ENSG00000226003	RP11-312J18.3	1	160817801	1
ENSG00000186517	ARHGAP30	1	161016732	1
ENSG00000158793	NIT1	1	161087876	1
ENSG00000143222	UFC1	1	161122566	1
ENSG00000143224	PPOX	1	161136200	1
ENSG00000158850	B4GALT3	1	161141100	1
ENSG00000158882	TOMM40L	1	161195793	1
ENSG00000241396	AL592295.2	1	161390661	1
ENSG00000132185	FCRLA	1	161676762	1
ENSG00000081721	DUSP12	1	161719548	1
ENSG00000226889	RP11-474I16.8	1	161732646	1
ENSG00000232995	RP11-267N12.3	1	163214295	1
ENSG00000215838	RP11-466F5.5	1	165667987	1
ENSG00000224358	RP11-466F5.8	1	165738166	1
ENSG00000143179	UCK2	1	165796768	1
ENSG00000143157	POGK	1	166808684	1
ENSG00000152382	TADA1	1	166825747	1
ENSG00000143190	POU2F1	1	167190120	1
ENSG00000198771	RCSD1	1	167599330	1
ENSG00000197965	MPZL1	1	167690429	1
ENSG00000143158	BRP44	1	167885967	1
ENSG00000213064	SFT2D2	1	168195176	1
ENSG00000143156	NME7	1	169101769	1
ENSG00000213062	Z99572.1	1	169455380	1
ENSG00000171806	C1orf156	1	169761670	1
ENSG00000000457	SCYL3	1	169821804	1
ENSG00000117523	BAT2D1	1	171454666	1
ENSG00000117533	VAMP4	1	171669300	1
ENSG00000010165	METTL13	1	171750788	1
ENSG00000247291	AL022310.2	1	173204199	1
ENSG00000203739	RP11-296O14.3	1	173386932	1
ENSG00000117592	PRDX6	1	173446405	1
ENSG00000120334	CENPL	1	173768688	1
ENSG00000200954	SNORD74	1	173836809	1
ENSG00000152061	RABGAP1L	1	174128548	1
ENSG00000223828	RP11-64I24.1	1	174725988	1
ENSG00000120333	MRPS14	1	174979925	1
ENSG00000229218	RP3-518E13.2	1	175276354	1
ENSG00000143207	RFWD2	1	175913967	1
ENSG00000116191	RALGPS2	1	178694300	1
ENSG00000116199	FAM20B	1	178994939	1
ENSG00000143337	TOR1AIP1	1	179851177	1
ENSG00000135847	ACBD6	1	180244515	1
ENSG00000135823	STX6	1	180941861	1
ENSG00000162783	IER5	1	181057638	1
ENSG00000135838	NPL	1	182758428	1
ENSG00000247330	AL355999.1	1	182806325	1
ENSG00000135862	LAMC1	1	182992597	1
ENSG00000162704	ARPC5	1	183592401	1
ENSG00000198860	TSEN15	1	184020811	1
ENSG00000116406	EDEM3	1	184659637	1
ENSG00000121481	RNF2	1	185014496	1
ENSG00000047410	TPR	1	186282954	1
ENSG00000116741	RGS2	1	192778169	1
ENSG00000023572	GLRX2	1	193065598	1
ENSG00000134371	CDC73	1	193090919	1
ENSG00000203724	C1orf53	1	197871777	1
ENSG00000223881	RP11-553K8.2	1	198566854	1
ENSG00000081237	PTPRC	1	198607801	1
ENSG00000118197	DDX59	1	200593024	1
ENSG00000232257	RP11-92G12.3	1	200638635	1
ENSG00000116852	KIF21B	1	200938518	1
ENSG00000159173	TNNI1	1	201372896	1
ENSG00000231871	RP11-90L20.3	1	201657387	1
ENSG00000134375	TIMM17A	1	201924619	1
ENSG00000239046	snoU13	1	202200792	1
ENSG00000077152	UBE2T	1	202300785	1
ENSG00000183155	RABIF	1	202848085	1
ENSG00000163444	TMEM183A	1	202976514	1
ENSG00000133063	CHIT1	1	203181955	1
ENSG00000231507	RP11-134P9.3	1	203256280	1
ENSG00000202300	U6	1	203288124	1
ENSG00000122188	LAX1	1	203734284	1
ENSG00000182004	SNRPE	1	203830731	1
ENSG00000158615	PPP1R15B	1	204372515	1
ENSG00000198625	MDM4	1	204485511	1
ENSG00000117222	RBBP5	1	205055270	1
ENSG00000163545	NUAK2	1	205271187	1
ENSG00000206762	U6	1	205564169	1
ENSG00000158711	ELK4	1	205577071	1
ENSG00000158715	SLC45A3	1	205626979	1
ENSG00000196533	C1orf186	1	206238872	1
ENSG00000196188	CTSE	1	206317459	1
ENSG00000143486	LGTN	1	206744620	1
ENSG00000237605	RP11-343H5.6	1	206807994	1
ENSG00000196352	CD55	1	207494817	1
ENSG00000117322	CR2	1	207627575	1
ENSG00000207790	hsa-mir-29b-2	1	207975788	1
ENSG00000117597	C1orf107	1	210001352	1
ENSG00000117625	RCOR3	1	211432621	1
ENSG00000153363	C1orf97	1	211556145	1
ENSG00000170385	SLC30A1	1	211744910	1
ENSG00000143493	INTS7	1	212113741	1
ENSG00000065600	TMEM206	1	212537273	1
ENSG00000117697	NSL1	1	212899495	1
ENSG00000162769	FLVCR1	1	213031597	1
ENSG00000143499	SMYD2	1	214454445	1
ENSG00000117724	CENPF	1	214776538	1
ENSG00000067533	RRP15	1	218458629	1
ENSG00000143353	LYPLAL1	1	219347186	1
ENSG00000136628	EPRS	1	220141943	1
ENSG00000067704	IARS2	1	220267444	1
ENSG00000143507	DUSP10	1	221874766	1
ENSG00000234419	CICP13	1	222641436	1
ENSG00000143786	CNIH3	1	224622362	1
ENSG00000143815	LBR	1	225589204	1
ENSG00000234476	RP11-496N12.6	1	225634945	1
ENSG00000154380	ENAH	1	225677502	1
ENSG00000143742	SRP9	1	225965531	1
ENSG00000196187	TMEM63A	1	226033237	1
ENSG00000143811	PYCR2	1	226074396	1
ENSG00000143751	C1orf55	1	226170403	1
ENSG00000163041	H3F3A	1	226249552	1
ENSG00000234478	RP11-275I14.4	1	226335704	1
ENSG00000236994	RP11-125A15.1	1	226505716	1
ENSG00000143799	PARP1	1	226548392	1
ENSG00000229965	RP11-118H4.1	1	226626265	1
ENSG00000143772	ITPKB	1	226819391	1
ENSG00000228525	RP5-1087E8.2	1	227145770	1
ENSG00000081692	JMJD4	1	227918126	1
ENSG00000143761	ARF1	1	228270361	1
ENSG00000143793	C1orf35	1	228288427	1
ENSG00000162910	MRPL55	1	228294380	1
ENSG00000181873	C1orf69	1	228353516	1
ENSG00000154370	TRIM11	1	228581373	1
ENSG00000154429	C1orf96	1	229456758	1
ENSG00000069248	NUP133	1	229577044	1
ENSG00000135776	ABCB10	1	229652329	1
ENSG00000135801	TAF5L	1	229728858	1
ENSG00000135763	URB2	1	229761981	1
ENSG00000143641	GALNT2	1	230193737	1
ENSG00000135775	COG2	1	230778235	1
ENSG00000173409	ARV1	1	231114727	1
ENSG00000116906	GNPAT	1	231376919	1
ENSG00000116918	TSNAX	1	231664287	1
ENSG00000135778	C1orf57	1	233086351	1
ENSG00000231663	RP5-827C21.4	1	234508553	1
ENSG00000212144	U8	1	234729021	1
ENSG00000227630	RP4-781K5.8	1	234861148	1
ENSG00000233018	RP4-597N16.1	1	235260502	1
ENSG00000173726	TOMM20	1	235272651	1
ENSG00000188739	RBM34	1	235294498	1
ENSG00000116957	TBCE	1	235530675	1
ENSG00000162885	B3GALNT2	1	235613238	1
ENSG00000119285	HEATR1	1	236712305	1
ENSG00000116984	MTR	1	236958581	1
ENSG00000091483	FH	1	241660903	1
ENSG00000117009	KMO	1	241695434	1
ENSG00000174371	EXO1	1	242011482	1
ENSG00000143702	CEP170	1	243287730	1
ENSG00000035687	ADSS	1	244571796	1
ENSG00000121644	PPPDE1	1	244816237	1
ENSG00000203667	FAM36A	1	244998624	1
ENSG00000153187	HNRNPU	1	245013602	1
ENSG00000201758	7SK	1	245107212	1
ENSG00000203666	EFCAB2	1	245133171	1
ENSG00000179576	AL356512.2	1	245133288	1
ENSG00000162851	TFB2M	1	246703862	1
ENSG00000153207	AHCTF1	1	247002400	1
ENSG00000162714	ZNF496	1	247460714	1
ENSG00000171163	ZNF692	1	249144205	1
ENSG00000143727	ACP1	2	264140	1
ENSG00000151353	TMEM18	2	667335	1
ENSG00000233296	AC092159.2	2	677186	1
ENSG00000032389	TSSC1	2	3192696	1
ENSG00000171853	TTC15	2	3383446	1
ENSG00000235078	AC142528.1	2	3523046	1
ENSG00000171865	RNASEH1	2	3592383	1
ENSG00000171863	RPS7	2	3622795	1
ENSG00000226506	AC007463.2	2	8026901	1
ENSG00000235665	AC007464.1	2	8062556	1
ENSG00000236790	C2orf46	2	8147901	1
ENSG00000119185	ITGB1BP1	2	9543604	1
ENSG00000134330	IAH1	2	9613787	1
ENSG00000151694	ADAM17	2	9628615	1
ENSG00000134308	YWHAQ	2	9724101	1
ENSG00000115750	TAF1B	2	9973981	1
ENSG00000171848	RRM2	2	10262455	1
ENSG00000206633	SNORA42	2	10586840	1
ENSG00000115761	NOL10	2	10710892	1
ENSG00000238962	U7	2	10955611	1
ENSG00000230790	AC012456.4	2	11881123	1
ENSG00000238503	SNORD18	2	12170429	1
ENSG00000235127	AC068286.1	2	15026771	1
ENSG00000079785	DDX1	2	15731302	1
ENSG00000240857	RDH14	2	18735989	1
ENSG00000183891	TTC32	2	20096404	1
ENSG00000055917	PUM2	2	20448452	1
ENSG00000118961	C2orf43	2	20883803	1
ENSG00000173960	UBXN2A	2	24150155	1
ENSG00000222940	U6	2	24268705	1
ENSG00000115128	AC008073.5	2	24290454	1
ENSG00000184924	C2orf79	2	25012855	1
ENSG00000115137	DNAJC27	2	25166505	1
ENSG00000235072	AC012074.2	2	25592042	1
ENSG00000084733	RAB10	2	26256976	1
ENSG00000173567	GPR113	2	26531041	1
ENSG00000119777	TMEM214	2	27255778	1
ENSG00000228474	OST4	2	27293340	1
ENSG00000138080	EMILIN1	2	27301435	1
ENSG00000138030	KHK	2	27309615	1
ENSG00000138085	C2orf28	2	27434895	1
ENSG00000084774	CAD	2	27440258	1
ENSG00000115204	MPV17	2	27532360	1
ENSG00000115207	GTF3C2	2	27548716	1
ENSG00000115211	EIF2B4	2	27587219	1
ENSG00000115234	SNX17	2	27593389	1
ENSG00000115241	PPM1G	2	27604061	1
ENSG00000243943	ZNF512	2	27805893	1
ENSG00000176714	CCDC121	2	27848506	1
ENSG00000075426	FOSL2	2	28615315	1
ENSG00000213639	PPP1CB	2	28974506	1
ENSG00000171103	TRMT61B	2	29072687	1
ENSG00000163811	WDR43	2	29117509	1
ENSG00000172954	LCLAT1	2	30670092	1
ENSG00000162961	DPY30	2	32092878	1
ENSG00000021574	SPAST	2	32288680	1
ENSG00000152683	SLC30A6	2	32390933	1
ENSG00000115760	BIRC6	2	32582096	1
ENSG00000018699	TTC27	2	32853099	1
ENSG00000152689	RASGRP3	2	33656569	1
ENSG00000119812	FAM98A	2	33808725	1
ENSG00000217075	AC007401.2	2	36758948	1
ENSG00000115808	STRN	2	37070783	1
ENSG00000008869	HEATR5B	2	37195526	1
ENSG00000138068	SULT6B1	2	37394963	1
ENSG00000003509	C2orf56	2	37458774	1
ENSG00000163171	CDC42EP3	2	37869032	1
ENSG00000119787	ATL2	2	38522022	1
ENSG00000231367	AC016995.3	2	38633861	1
ENSG00000115875	SFRS7	2	38970741	1
ENSG00000115904	SOS1	2	39208537	1
ENSG00000138050	THUMPD2	2	39963200	1
ENSG00000143924	EML4	2	42396490	1
ENSG00000057935	MTA3	2	42721709	1
ENSG00000226491	AC098824.5	2	43024365	1
ENSG00000178006	AC010883.4	2	43454480	1
ENSG00000115970	THADA	2	43457975	1
ENSG00000138095	LRPPRC	2	44113647	1
ENSG00000138078	PREPL	2	44543420	1
ENSG00000231054	AC009236.2	2	45395722	1
ENSG00000171132	PRKCE	2	45878484	1
ENSG00000228481	U51244.2	2	45901840	1
ENSG00000250565	AC018682.2	2	46761138	1
ENSG00000068724	TTC7A	2	47143296	1
ENSG00000095002	MSH2	2	47630108	1
ENSG00000236558	AC138655.6	2	47713153	1
ENSG00000235760	AC138655.4	2	47754133	1
ENSG00000116062	MSH6	2	48010221	1
ENSG00000162869	KLRAQ1	2	48667737	1
ENSG00000143942	CHAC2	2	53994929	1
ENSG00000068878	PSME4	2	54091204	1
ENSG00000170634	ACYP2	2	54342540	1
ENSG00000234943	AC092839.4	2	54772505	1
ENSG00000200086	U6	2	55241554	1
ENSG00000162994	C2orf63	2	55401927	1
ENSG00000085760	MTIF2	2	55463731	1
ENSG00000115355	CCDC88A	2	55514978	1
ENSG00000138041	SMEK2	2	55774428	1
ENSG00000138035	PNPT1	2	55861198	1
ENSG00000251738	AC073215.1	2	58289716	1
ENSG00000228414	AC010733.4	2	61052267	1
ENSG00000115464	USP34	2	61414591	1
ENSG00000170264	FAM161A	2	62051983	1
ENSG00000115484	CCT4	2	62095224	1
ENSG00000173163	COMMD1	2	62115859	1
ENSG00000233716	AC074367.1	2	63459588	1
ENSG00000014641	MDH1	2	63815743	1
ENSG00000169764	UGP2	2	64068074	1
ENSG00000227394	AC007386.3	2	65187187	1
ENSG00000011523	CEP68	2	65283500	1
ENSG00000138069	RAB1A	2	65297835	1
ENSG00000138071	ACTR2	2	65454887	1
ENSG00000143971	ETAA1	2	67624451	1
ENSG00000221823	PPP3R1	2	68358370	1
ENSG00000115946	PNO1	2	68384976	1
ENSG00000216115	AC017083.1	2	68457058	1
ENSG00000115956	PLEK	2	68592305	1
ENSG00000237576	AC097495.2	2	69059176	1
ENSG00000198380	GFPT1	2	69552403	1
ENSG00000087338	GMCL1	2	70056774	1
ENSG00000238465	snoU13	2	70139827	1
ENSG00000169564	PCBP1	2	70314585	1
ENSG00000233060	AC016700.2	2	70316853	1
ENSG00000231327	AC016700.5	2	70351168	1
ENSG00000115998	C2orf42	2	70377012	1
ENSG00000143977	SNRPG	2	70508494	1
ENSG00000035141	FAM136A	2	70523107	1
ENSG00000144031	ANKRD53	2	71205510	1
ENSG00000124357	NAGK	2	71295408	1
ENSG00000124383	MPHOSPH10	2	71357444	1
ENSG00000075292	ZNF638	2	71503691	1
ENSG00000135632	SMYD5	2	73441350	1
ENSG00000135624	CCT7	2	73460548	1
ENSG00000116127	ALMS1	2	73612886	1
ENSG00000144048	DUSP11	2	73989311	1
ENSG00000124356	STAMBP	2	74056086	1
ENSG00000114956	DGUOK	2	74153953	1
ENSG00000235499	AC073046.25	2	74212259	1
ENSG00000065911	MTHFD2	2	74425689	1
ENSG00000159239	C2orf81	2	74641305	1
ENSG00000115274	INO80B	2	74682150	1
ENSG00000239779	WBP1	2	74685456	1
ENSG00000115275	MOGS	2	74688184	1
ENSG00000204822	MRPL53	2	74699085	1
ENSG00000115289	PCGF1	2	74732170	1
ENSG00000115317	HTRA2	2	74756504	1
ENSG00000159399	HK2	2	75061108	1
ENSG00000115350	POLE4	2	75185619	1
ENSG00000005436	C2orf3	2	75879126	1
ENSG00000176407	KCMF1	2	85198216	1
ENSG00000152291	TGOLN2	2	85545147	1
ENSG00000042493	CAPG	2	85621871	1
ENSG00000207207	Y_RNA	2	85661630	1
ENSG00000168899	VAMP5	2	85811531	1
ENSG00000168887	C2orf68	2	85833777	1
ENSG00000068654	POLR1A	2	86253451	1
ENSG00000132305	IMMT	2	86371055	1
ENSG00000115548	KDM3A	2	86667770	1
ENSG00000249884	RP11-269K22.1	2	86756341	1
ENSG00000239305	RNF103	2	86830516	1
ENSG00000153574	RPIA	2	88991162	1
ENSG00000223816	AC128677.4	2	92222552	1
ENSG00000144029	MRPS5	2	95752952	1
ENSG00000163067	ZNF2	2	95831177	1
ENSG00000222040	ADRA2B	2	96778629	1
ENSG00000158050	DUSP2	2	96808905	1
ENSG00000228873	AC012307.2	2	96811341	1
ENSG00000084090	STARD7	2	96850597	1
ENSG00000144021	CIAO1	2	96931870	1
ENSG00000144028	SNRNP200	2	96940074	1
ENSG00000230747	AC021188.4	2	96973001	1
ENSG00000115073	ACTR1B	2	98272431	1
ENSG00000075568	TMEM131	2	98372796	1
ENSG00000183513	C2orf64	2	99215773	1
ENSG00000144182	LIPT1	2	99771418	1
ENSG00000135945	REV1	2	100016938	1
ENSG00000144218	AFF3	2	100163718	1
ENSG00000232084	AC104782.3	2	100824716	1
ENSG00000115539	PDCL3	2	101179152	1
ENSG00000223947	AC016738.4	2	101610138	1
ENSG00000204634	TBC1D8	2	101622395	1
ENSG00000163162	RNF149	2	101887681	1
ENSG00000135974	C2orf49	2	105953816	1
ENSG00000115652	UXS1	2	106709759	1
ENSG00000233339	AC018878.3	2	106795998	1
ENSG00000153201	RANBP2	2	109335902	1
ENSG00000144061	NPHP1	2	110879888	1
ENSG00000153094	BCL2L11	2	111876955	1
ENSG00000153107	ANAPC1	2	112523848	1
ENSG00000153214	TMEM87B	2	112812800	1
ENSG00000144161	ZC3H8	2	112973254	1
ENSG00000114999	TTL	2	113239731	1
ENSG00000125630	POLR1B	2	113299492	1
ENSG00000237753	AC079922.3	2	113399409	1
ENSG00000115084	SLC35F5	2	114462588	1
ENSG00000088205	DDX18	2	118572226	1
ENSG00000224967	AC009303.3	2	118691601	1
ENSG00000186132	C2orf76	2	120059801	1
ENSG00000144120	TMEM177	2	120436743	1
ENSG00000088179	PTPN4	2	120517207	1
ENSG00000202046	Y_RNA	2	120949821	1
ENSG00000226479	TMEM185B	2	120979500	1
ENSG00000155438	MKI67IP	2	122484521	1
ENSG00000211460	TSN	2	122494679	1
ENSG00000115718	PROC	2	128176003	1
ENSG00000163166	IWS1	2	128193783	1
ENSG00000136709	WDR33	2	128458596	1
ENSG00000144231	POLR2D	2	128603896	1
ENSG00000136731	UGGT1	2	128848774	1
ENSG00000233428	AC019050.1	2	130253870	1
ENSG00000152082	FAM128B	2	130939310	1
ENSG00000136710	CCDC115	2	131095814	1
ENSG00000072135	PTPN18	2	131113580	1
ENSG00000152102	FAM168B	2	131805449	1
ENSG00000152117	AC093838.4	2	132250386	1
ENSG00000163046	NCRNA00164	2	132905164	1
ENSG00000234060	AC016906.1	2	135077225	1
ENSG00000224043	AC016725.4	2	135493034	1
ENSG00000115839	RAB3GAP1	2	135809835	1
ENSG00000121988	ZRANB3	2	135894486	1
ENSG00000048991	R3HDM1	2	136289025	1
ENSG00000144224	UBXN4	2	136499189	1
ENSG00000076003	MCM6	2	136597196	1
ENSG00000231890	AC093391.2	2	136742746	1
ENSG00000227347	AC068492.3	2	136956684	1
ENSG00000231766	AC013437.7	2	143858499	1
ENSG00000121964	GTDC1	2	144703321	1
ENSG00000214064	AC064865.2	2	146094798	1
ENSG00000232238	AC017080.1	2	149352727	1
ENSG00000123609	NMI	2	152126979	1
ENSG00000080345	RIF1	2	152266397	1
ENSG00000162980	ARL5A	2	152645498	1
ENSG00000177917	ARL6IP6	2	153574407	1
ENSG00000153234	NR4A2	2	157180944	1
ENSG00000216054	AC019201.1	2	158298062	1
ENSG00000144283	PK4P	2	159313476	1
ENSG00000196151	WDSUB1	2	160092304	1
ENSG00000226266	AC009961.3	2	160527219	1
ENSG00000248672	RP11-357L2.1	2	160628362	1
ENSG00000115233	PSMD14	2	162164549	1
ENSG00000123607	TTC21B	2	166713985	1
ENSG00000198648	STK39	2	168810530	1
ENSG00000138399	FASTKD1	2	170386259	1
ENSG00000138398	PPIG	2	170440850	1
ENSG00000138385	SSB	2	170648443	1
ENSG00000138382	METTL5	2	170666591	1
ENSG00000115840	SLC25A12	2	172640880	1
ENSG00000128708	HAT1	2	172778958	1
ENSG00000225205	AC093818.1	2	173345568	1
ENSG00000144354	CDCA7	2	174219548	1
ENSG00000172845	SP3	2	174771187	1
ENSG00000138430	OLA1	2	174937175	1
ENSG00000115935	WIPF1	2	175424300	1
ENSG00000237798	AC010894.5	2	175439955	1
ENSG00000128654	MTX2	2	177134123	1
ENSG00000229337	AC079305.8	2	178020350	1
ENSG00000170144	HNRNPA3	2	178077291	1
ENSG00000018510	AGPS	2	178257372	1
ENSG00000204311	DFNB59	2	179316163	1
ENSG00000079150	FKBP7	2	179328391	1
ENSG00000115232	ITGA4	2	182321619	1
ENSG00000163002	NUP35	2	183982242	1
ENSG00000065548	ZC3H15	2	187350883	1
ENSG00000115368	WDR75	2	190306159	1
ENSG00000138381	ASNSD1	2	190526146	1
ENSG00000128694	OSGEPL1	2	190611386	1
ENSG00000128699	ORMDL1	2	190635049	1
ENSG00000189362	TMEM194B	2	191369068	1
ENSG00000138386	NAB1	2	191511472	1
ENSG00000235852	AC005540.3	2	191745523	1
ENSG00000115415	STAT1	2	191829084	1
ENSG00000230686	AC067945.2	2	191882680	1
ENSG00000173559	OBFC2A	2	192542794	1
ENSG00000081320	STK17B	2	196998290	1
ENSG00000065413	ANKRD44	2	197831741	1
ENSG00000115524	SF3B1	2	198256698	1
ENSG00000115540	MOBKL3	2	198380295	1
ENSG00000152428	MARS2	2	198570087	1
ENSG00000162972	C2orf47	2	200820040	1
ENSG00000243478	AOX2P	2	201560640	1
ENSG00000013441	CLK1	2	201717732	1
ENSG00000115942	ORC2L	2	201773696	1
ENSG00000064012	CASP8	2	202098166	1
ENSG00000115993	TRAK2	2	202241930	1
ENSG00000055044	NOP58	2	203130439	1
ENSG00000138439	FAM117B	2	203499911	1
ENSG00000163596	ICA1L	2	203640690	1
ENSG00000138380	ALS2CR8	2	203776937	1
ENSG00000119004	CYP20A1	2	204103663	1
ENSG00000178562	CD28	2	204571198	1
ENSG00000118257	NRP2	2	206546714	1
ENSG00000023228	NDUFS1	2	206986149	1
ENSG00000138400	MDH1B	2	207602487	1
ENSG00000144401	FAM119A	2	208445355	1
ENSG00000231908	AC016697.3	2	209119971	1
ENSG00000030419	IKZF2	2	213864429	1
ENSG00000138376	BARD1	2	215590370	1
ENSG00000138363	ATIC	2	216176540	1
ENSG00000079246	XRCC5	2	216972187	1
ENSG00000232485	AC098820.3	2	217343753	1
ENSG00000127837	AAMP	2	219128850	1
ENSG00000144580	RQCD1	2	219433303	1
ENSG00000115568	ZNF142	2	219502639	1
ENSG00000074582	BCS1L	2	219523487	1
ENSG00000135912	TTLL4	2	219575568	1
ENSG00000187736	NHEJ1	2	219940039	1
ENSG00000144567	FAM134A	2	220040947	1
ENSG00000115657	ABCB6	2	220074490	1
ENSG00000243910	TUBA4B	2	220117965	1
ENSG00000135924	DNAJB2	2	220143989	1
ENSG00000207647	hsa-mir-153-1	2	220158833	1
ENSG00000116120	FARSB	2	223435255	1
ENSG00000152056	AP1S3	2	224616403	1
ENSG00000135900	MRPL44	2	224822121	1
ENSG00000144468	RHBDD1	2	227700297	1
ENSG00000212391	SNORA48	2	227833705	1
ENSG00000168958	MFF	2	228189867	1
ENSG00000241530	AC006368.1	2	230045488	1
ENSG00000153827	TRIP12	2	230631930	1
ENSG00000153832	FBXO36	2	230787018	1
ENSG00000239448	AC018738.1	2	232110047	1
ENSG00000202400	SNORD82	2	232325082	1
ENSG00000181798	C2orf52	2	232373137	1
ENSG00000156973	PDE6D	2	232597135	1
ENSG00000163273	NPPC	2	232786530	1
ENSG00000144535	DIS3L2	2	232825955	1
ENSG00000223788	AC068134.4	2	233306744	1
ENSG00000135902	CHRND	2	233390703	1
ENSG00000221944	TIGD1	2	233412779	1
ENSG00000168918	INPP5D	2	233924677	1
ENSG00000201013	Y_RNA	2	234288489	1
ENSG00000123485	HJURP	2	234742062	1
ENSG00000124835	AC105760.3	2	237957242	1
ENSG00000184182	UBE2F	2	238875469	1
ENSG00000132330	SCLY	2	238969530	1
ENSG00000132326	PER2	2	239152679	1
ENSG00000065802	ASB1	2	239335383	1
ENSG00000068024	HDAC4	2	239969864	1
ENSG00000144504	ANKMY1	2	241418839	1
ENSG00000122085	MTERFD2	2	242014096	1
ENSG00000168385	SEPT2	2	242254515	1
ENSG00000006607	FARP2	2	242295658	1
ENSG00000115694	STK25	2	242432089	1
ENSG00000176946	THAP4	2	242523820	1
ENSG00000168397	ATG4B	2	242576628	1
ENSG00000168393	DTYMK	2	242615157	1
ENSG00000168395	ING5	2	242641450	1
ENSG00000180902	D2HGDH	2	242673994	1
ENSG00000072756	TRNT1	3	3168600	1
ENSG00000144455	SUMF1	3	3742498	1
ENSG00000170364	SETMAR	3	4344988	1
ENSG00000150995	ITPR1	3	4535034	1
ENSG00000235831	AC018816.4	3	4938493	1
ENSG00000070950	RAD18	3	8817088	1
ENSG00000134077	THUMPD3	3	9404526	1
ENSG00000206573	AC018506.1	3	9438147	1
ENSG00000168137	SETD5	3	9439299	1
ENSG00000144550	CPNE9	3	9745491	1
ENSG00000114026	OGG1	3	9791628	1
ENSG00000156990	RPUSD3	3	9879533	1
ENSG00000171135	JAGN1	3	9932238	1
ENSG00000163703	CRELD1	3	9975506	1
ENSG00000134075	C3orf10	3	10157276	1
ENSG00000238345	snoU13	3	10182834	1
ENSG00000157014	TATDN2	3	10289707	1
ENSG00000197548	ATG7	3	11313995	1
ENSG00000144560	VGLL4	3	11597544	1
ENSG00000154743	TSEN2	3	12525931	1
ENSG00000075975	MKRN2	3	12598513	1
ENSG00000132155	RAF1	3	12625100	1
ENSG00000144713	RPL32	3	12875984	1
ENSG00000246066	AC069271.1	3	13054481	1
ENSG00000223398	AC027124.2	3	13501924	1
ENSG00000163528	CHCHD4	3	14153580	1
ENSG00000131379	C3orf20	3	14716606	1
ENSG00000225733	AC090937.2	3	14961854	1
ENSG00000177463	NR2C2	3	14989091	1
ENSG00000131368	MRPS25	3	15083967	1
ENSG00000131381	ZFYVE20	3	15111580	1
ENSG00000230524	DVWA	3	15193340	1
ENSG00000154813	DPH3	3	16299485	1
ENSG00000233133	AC104451.2	3	17747550	1
ENSG00000170142	UBE2E1	3	23847394	1
ENSG00000174748	RPL15	3	23958036	1
ENSG00000174738	NR1D2	3	23986751	1
ENSG00000151092	NGLY1	3	25760435	1
ENSG00000033867	SLC4A7	3	27414214	1
ENSG00000187118	CMC1	3	28283075	1
ENSG00000163513	TGFBR2	3	30647994	1
ENSG00000163527	STT3B	3	31574130	1
ENSG00000152642	GPD1L	3	32147181	1
ENSG00000227337	AC139452.2	3	32827138	1
ENSG00000153560	UBP1	3	33429828	1
ENSG00000170248	PDCD6IP	3	33839557	1
ENSG00000230830	RP11-380G10.1	3	35691689	1
ENSG00000178567	EPM2AIP1	3	37027357	1
ENSG00000076242	MLH1	3	37034823	1
ENSG00000144674	GOLGA4	3	37284668	1
ENSG00000136059	VILL	3	38029550	1
ENSG00000093217	XYLB	3	38388251	1
ENSG00000168028	RPSA	3	39448180	1
ENSG00000188846	RPL14	3	40498783	1
ENSG00000172888	ZNF621	3	40566369	1
ENSG00000168036	CTNNB1	3	41236328	1
ENSG00000182606	TRAK1	3	42055294	1
ENSG00000229339	RP11-193I22.2	3	42092673	1
ENSG00000008324	SS18L2	3	42623332	1
ENSG00000114857	NKTR	3	42642106	1
ENSG00000235886	RP4-672N11.1	3	43820453	1
ENSG00000179152	C3orf23	3	44379611	1
ENSG00000163807	KIAA1143	3	44779153	1
ENSG00000163812	ZDHHC3	3	44956749	1
ENSG00000011376	LARS2	3	45429998	1
ENSG00000144791	LIMD1	3	45596886	1
ENSG00000163820	FYCO1	3	45959396	1
ENSG00000160808	MYL3	3	46899362	1
ENSG00000088727	KIF9	3	47269516	1
ENSG00000114648	KLHL18	3	47324330	1
ENSG00000076201	PTPN23	3	47422491	1
ENSG00000114650	SCAP	3	47455184	1
ENSG00000132153	DHX30	3	47844399	1
ENSG00000047849	MAP4	3	47892182	1
ENSG00000164048	ZNF589	3	48282590	1
ENSG00000172113	NME6	3	48334754	1
ENSG00000164053	ATRIP	3	48488114	1
ENSG00000114268	PFKFB4	3	48555117	1
ENSG00000228350	RP11-148G20.1	3	48701209	1
ENSG00000213672	NCKIPSD	3	48701364	1
ENSG00000178537	SLC25A20	3	48894369	1
ENSG00000177479	ARIH2	3	48956254	1
ENSG00000178252	WDR6	3	49044495	1
ENSG00000199032	hsa-mir-425	3	49057581	1
ENSG00000178035	IMPDH2	3	49061758	1
ENSG00000172053	QARS	3	49133365	1
ENSG00000177352	CCDC71	3	49199968	1
ENSG00000114316	USP4	3	49315264	1
ENSG00000145022	TCTA	3	49449639	1
ENSG00000164062	APEH	3	49711435	1
ENSG00000185614	C3orf54	3	49840687	1
ENSG00000164077	MON1A	3	49946302	1
ENSG00000004534	RBM6	3	49977440	1
ENSG00000214706	IFRD2	3	50325163	1
ENSG00000243477	NAT6	3	50333833	1
ENSG00000068001	HYAL2	3	50355221	1
ENSG00000114395	CYB561D2	3	50388126	1
ENSG00000114737	CISH	3	50643921	1
ENSG00000145050	MANF	3	51422478	1
ENSG00000179837	RBM15B	3	51428731	1
ENSG00000145041	VPRBP	3	51433298	1
ENSG00000164080	RAD54L2	3	51575596	1
ENSG00000164081	TEX264	3	51696709	1
ENSG00000114767	RRP9	3	51967446	1
ENSG00000090097	PCBP4	3	51991470	1
ENSG00000162244	RPL29	3	52027644	1
ENSG00000164086	DUSP7	3	52082935	1
ENSG00000164087	WDR51A	3	52109269	1
ENSG00000164088	PPM1M	3	52279902	1
ENSG00000168237	GLYCTK	3	52321105	1
ENSG00000168268	NT5DC2	3	52558386	1
ENSG00000168273	C3orf78	3	52568029	1
ENSG00000163939	PBRM1	3	52579368	1
ENSG00000248592	RP11-894J14.4	3	52867166	1
ENSG00000163933	RFT1	3	53122499	1
ENSG00000163932	PRKCD	3	53190025	1
ENSG00000252504	AC097015.2	3	53243969	1
ENSG00000163931	TKT	3	53258723	1
ENSG00000162290	DCP1A	3	53317448	1
ENSG00000113812	ACTR8	3	53901093	1
ENSG00000157500	APPL1	3	57261765	1
ENSG00000174840	PDE12	3	57542003	1
ENSG00000168374	ARF4	3	57557090	1
ENSG00000163684	RPP14	3	58291974	1
ENSG00000168297	PXK	3	58318607	1
ENSG00000168291	PDHB	3	58413357	1
ENSG00000163634	THOC7	3	63819546	1
ENSG00000163635	ATXN7	3	63850233	1
ENSG00000206759	U6	3	66343538	1
ENSG00000163376	KBTBD8	3	67048731	1
ENSG00000172340	SUCLG2	3	67410884	1
ENSG00000221382	AC096971.2	3	70927811	1
ENSG00000114861	FOXP1	3	71003844	1
ENSG00000221264	hsa-mir-1284	3	71591121	1
ENSG00000243083	RP11-433A10.1	3	72200408	1
ENSG00000163602	RYBP	3	72423744	1
ENSG00000114480	GBE1	3	81538850	1
ENSG00000113966	ARL6	3	97483365	1
ENSG00000170854	MINA	3	97660661	1
ENSG00000184220	C3orf26	3	99536678	1
ENSG00000036054	TBC1D23	3	99979844	1
ENSG00000114021	NIT2	3	100053545	1
ENSG00000206535	LNP1	3	100120037	1
ENSG00000154175	ABI3BP	3	100468000	1
ENSG00000174173	RG9MTD1	3	101280706	1
ENSG00000081154	PCNP	3	101292939	1
ENSG00000066422	ZBTB11	3	101367733	1
ENSG00000174166	RP11-454H13.5	3	101395353	1
ENSG00000114391	RPL24	3	101399935	1
ENSG00000144802	NFKBIZ	3	101546835	1
ENSG00000196776	CD47	3	107761941	1
ENSG00000114446	IFT57	3	107879659	1
ENSG00000174500	GCET2	3	111839688	1
ENSG00000163608	C3orf17	3	112721287	1
ENSG00000121579	NAT13	3	113437841	1
ENSG00000184307	ZDHHC23	3	113666748	1
ENSG00000163617	KIAA1407	3	113682984	1
ENSG00000241490	RP11-553L6.2	3	113933160	1
ENSG00000242290	RP11-197K3.1	3	114172440	1
ENSG00000243359	AC012598.1	3	115556717	1
ENSG00000242622	RP11-18H7.1	3	119813742	1
ENSG00000163428	LRRC58	3	120043356	1
ENSG00000051341	POLQ	3	121150274	1
ENSG00000180353	HCLS1	3	121350246	1
ENSG00000173226	IQCB1	3	121488610	1
ENSG00000114013	CD86	3	121774213	1
ENSG00000160124	CCDC58	3	122078438	1
ENSG00000114023	FAM162A	3	122103023	1
ENSG00000196981	WDR5B	3	122130715	1
ENSG00000138496	PARP9	3	122246806	1
ENSG00000169087	HSPBAP1	3	122458846	1
ENSG00000065485	PDIA5	3	122785909	1
ENSG00000121542	SEC22A	3	122920774	1
ENSG00000239523	RP11-202D20.1	3	123304389	1
ENSG00000114491	UMPS	3	124449213	1
ENSG00000199327	U6	3	124837941	1
ENSG00000163848	ZNF148	3	124944405	1
ENSG00000159685	CHCHD6	3	126423063	1
ENSG00000225754	AC092898.1	3	126581924	1
ENSG00000163870	GPR175	3	127291912	1
ENSG00000073111	MCM2	3	127317066	1
ENSG00000058262	SEC61A1	3	127770484	1
ENSG00000212344	U6	3	127860718	1
ENSG00000132394	EEFSEC	3	127872297	1
ENSG00000198685	C3orf27	3	128290843	1
ENSG00000163902	RPN1	3	128338817	1
ENSG00000242024	AC079945.2	3	128392525	1
ENSG00000075785	RAB7A	3	128444965	1
ENSG00000177646	ACAD9	3	128598439	1
ENSG00000240682	ISY1	3	128806418	1
ENSG00000241673	RPS27P12	3	128936936	1
ENSG00000251474	RPL32P3	3	129101765	1
ENSG00000129071	MBD4	3	129149787	1
ENSG00000239437	AC023162.1	3	129310192	1
ENSG00000172765	TMCC1	3	129366635	1
ENSG00000252894	Y_RNA	3	130633185	1
ENSG00000114686	MRPL3	3	131181068	1
ENSG00000240303	OTTHUMG00000159780	3	132276982	1
ENSG00000214301	RP11-91K8.4	3	133209650	1
ENSG00000091527	CDV3	3	133292574	1
ENSG00000163781	TOPBP1	3	133317019	1
ENSG00000144867	SRPRB	3	133502877	1
ENSG00000182923	CEP63	3	134204585	1
ENSG00000174579	MSL2	3	135867764	1
ENSG00000114054	PCCB	3	135969148	1
ENSG00000239213	RP11-85F14.5	3	136560568	1
ENSG00000138231	DBR1	3	137879854	1
ENSG00000114098	ARMC8	3	137906109	1
ENSG00000158234	FAIM	3	138327448	1
ENSG00000249540	RP11-789L4.1	3	141026454	1
ENSG00000114125	RNF7	3	141457046	1
ENSG00000069849	ATP1B3	3	141594966	1
ENSG00000175066	GK5	3	141882414	1
ENSG00000175054	ATR	3	142168077	1
ENSG00000163714	SR140	3	142720181	1
ENSG00000163754	GYG1	3	148709128	1
ENSG00000071794	HLTF	3	148747914	1
ENSG00000082996	RNF13	3	149530495	1
ENSG00000120742	SERP1	3	150259781	1
ENSG00000144895	EIF2A	3	150264465	1
ENSG00000181788	SIAH2	3	150458914	1
ENSG00000229619	AC106722.1	3	151985873	1
ENSG00000174953	DHX36	3	153990335	1
ENSG00000169359	SLC33A1	3	155544305	1
ENSG00000163655	GMPS	3	155588325	1
ENSG00000243926	RP11-791I24.4	3	156389651	1
ENSG00000240875	RP11-392A22.2	3	156465135	1
ENSG00000178110	LEKR1	3	156544096	1
ENSG00000241135	RP11-6F2.6	3	156807670	1
ENSG00000163660	CCNL1	3	156864297	1
ENSG00000243176	RP11-550I24.2	3	156893012	1
ENSG00000174891	RSRC1	3	157823644	1
ENSG00000168827	GFM1	3	158362067	1
ENSG00000248710	RP11-431I8.2	3	159945241	1
ENSG00000186432	KPNA4	3	160212783	1
ENSG00000229320	KRT8P12	3	160283235	1
ENSG00000240138	RP11-20C6.2	3	161042701	1
ENSG00000239219	RP11-379K17.4	3	169657141	1
ENSG00000173889	PHC3	3	169804520	1
ENSG00000136603	SKIL	3	170075466	1
ENSG00000163584	RPL22L1	3	170582664	1
ENSG00000075420	FNDC3B	3	171757418	1
ENSG00000228676	AC069259.1	3	171758836	1
ENSG00000144959	AADACL1	3	172348039	1
ENSG00000226782	RP11-706D8.3	3	177055416	1
ENSG00000172667	ZMAT3	3	178735011	1
ENSG00000114450	GNB4	3	179116990	1
ENSG00000136518	ACTL6A	3	179280668	1
ENSG00000058056	USP13	3	179370543	1
ENSG00000243341	RP11-436A20.3	3	180707558	1
ENSG00000078070	MCCC1	3	182733006	1
ENSG00000114796	KLHL24	3	183353356	1
ENSG00000163872	YEATS2	3	183415606	1
ENSG00000233885	RP11-449K6.4	3	183525552	1
ENSG00000180834	MAP6D1	3	183533664	1
ENSG00000234371	RP11-315J22.5	3	183602712	1
ENSG00000114770	ABCC5	3	183637722	1
ENSG00000161203	AP2M1	3	183892477	1
ENSG00000161204	ABCF3	3	183903811	1
ENSG00000214160	ALG3	3	183960089	1
ENSG00000114867	EIF4G1	3	184032283	1
ENSG00000224153	RP11-433C9.2	3	184119325	1
ENSG00000177383	MAGEF1	3	184428156	1
ENSG00000156931	VPS8	3	184529925	1
ENSG00000163900	TMEM41A	3	185194284	1
ENSG00000163904	SENP2	3	185300284	1
ENSG00000136527	TRA2B	3	185633694	1
ENSG00000090520	DNAJB11	3	186285192	1
ENSG00000230951	RP11-573D15.6	3	186490378	1
ENSG00000156976	EIF4A2	3	186500994	1
ENSG00000238942	snR39B	3	186502585	1
ENSG00000163918	RFC4	3	186507669	1
ENSG00000073849	ST6GAL1	3	186648274	1
ENSG00000163923	RPL39L	3	186838736	1
ENSG00000225058	RP11-132N15.1	3	187715210	1
[truncated: 47,704 more rows]
